# Supplementary material for: Projecting future carbon emissions from cement production in developing countries
Source: Springer Nature journal article supplement (doi:10.1038/s41467-023-43660-x), 2023-12-11
Supplement: 41467_2023_43660_MOESM1_ESM.pdf [file 41467_2023_43660_MOESM1_ESM.pdf]

# 1 Projecting future emissions from cement production 2 in developing countries

## 3 **Supplementary Items**

## 4 **Supplementary Figures**

5 Here we show eleven supplementary figures to give a more in-depth illustration of the results.  
6 Figure S 1 to Supplementary Figure 3 are designed for the first part of the result in the main  
7 text- the distribution of global cement emissions. These figures give detailed information on  
8 time series cement production and emission intensity for selected countries. The countries are  
9 selected as case countries and can represent a wide range of countries in terms of their cement  
10 industry. They all have large population size, yet are different in the geological site, economic  
11 development and urbanization patterns and have significantly different cement production  
12 patterns. Supplementary Figure 4 presents the logistic relationship between GDP per capita  
13 and floor area per capita. Figure S 5 and Figure S 6 present the detailed future emission  
14 pattern. Supplementary Figure 7 and Supplementary Figure 8 give the evidence for the  
15 discussion part of climate target. Supplementary Figure 9 and Supplementary Figure 10  
16 describe the results for the sensitivity analysis. Supplementary Figure 11 to Figure S 16 support  
17 the methodology.

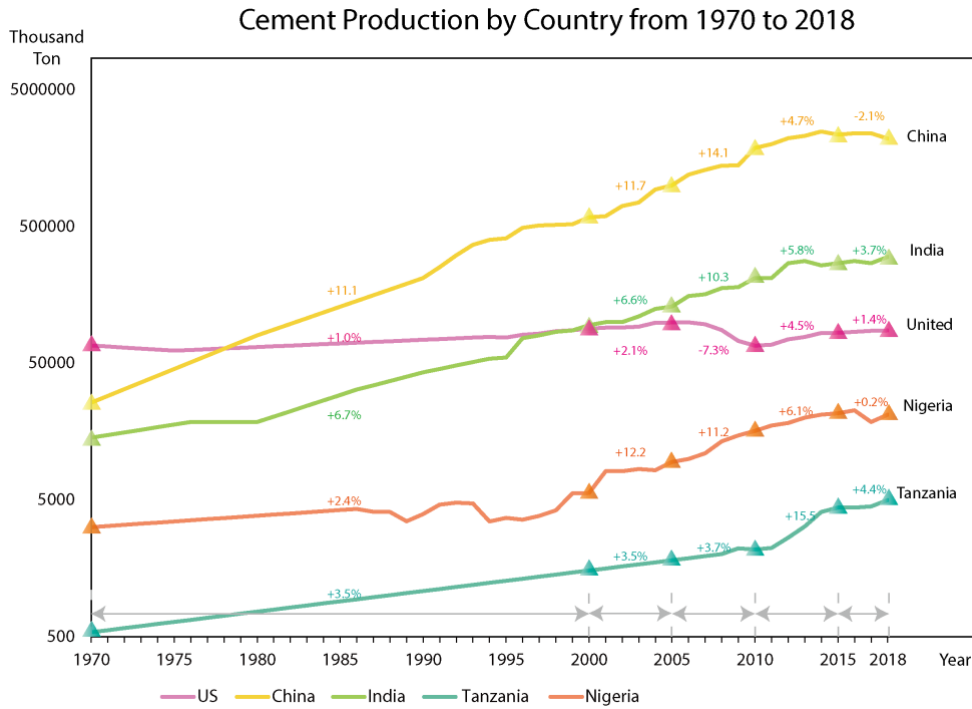

18 Supplementary Figure 1| Cement production for selected countries from 1970 to 2018. Due to data availability constraints, linear interpolation is adopted to fill the gap in cement production data over 1970-1993. Each number between two triangles indicates the average annual growth rate of cement production during the period. Related to Figure 1.

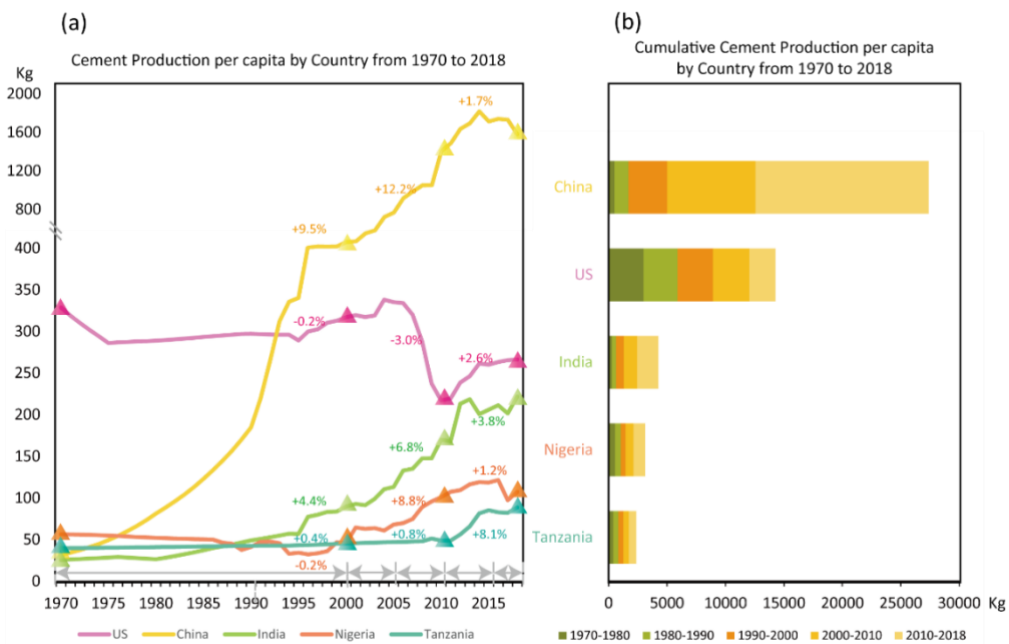

22 Supplementary Figure 2| Per capita cement production for selected countries from 1970 to 2018. Linear interpolation is used in certain time periods when data is not available. Pane (a) describes the variation of cement production per capita by country over time period, with each number between two triangles indicating the average annual growth rate of cement production per capita during the period. Pane (b) describes the cumulative cement production per capita by country, with the color indicating different decades. Related to Figure 1.

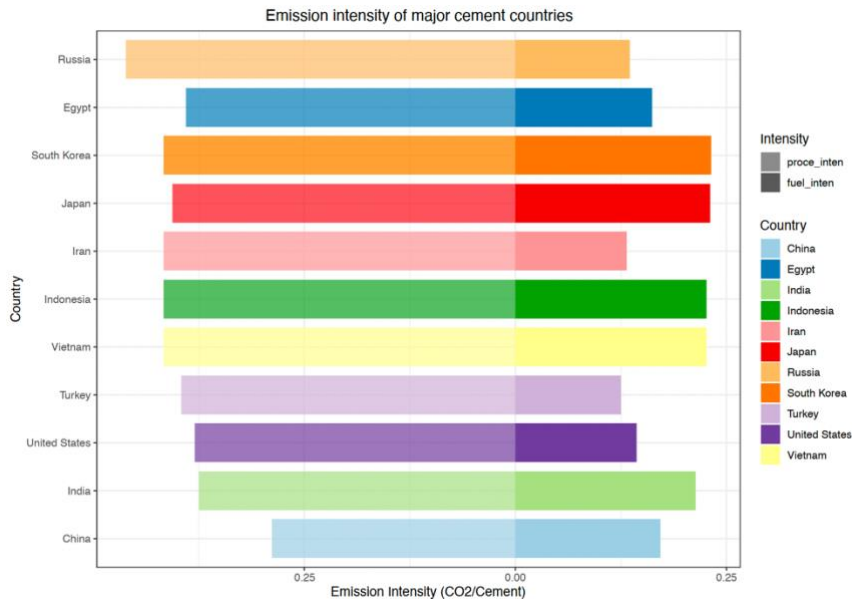

29 Supplementary Figure 3| Emissions intensity of major cement countries. The light color refers to process-related intensity and the dark color refers to fossil fuel-related intensity. Related to  
 30 Figure 1.  
 31  
 32

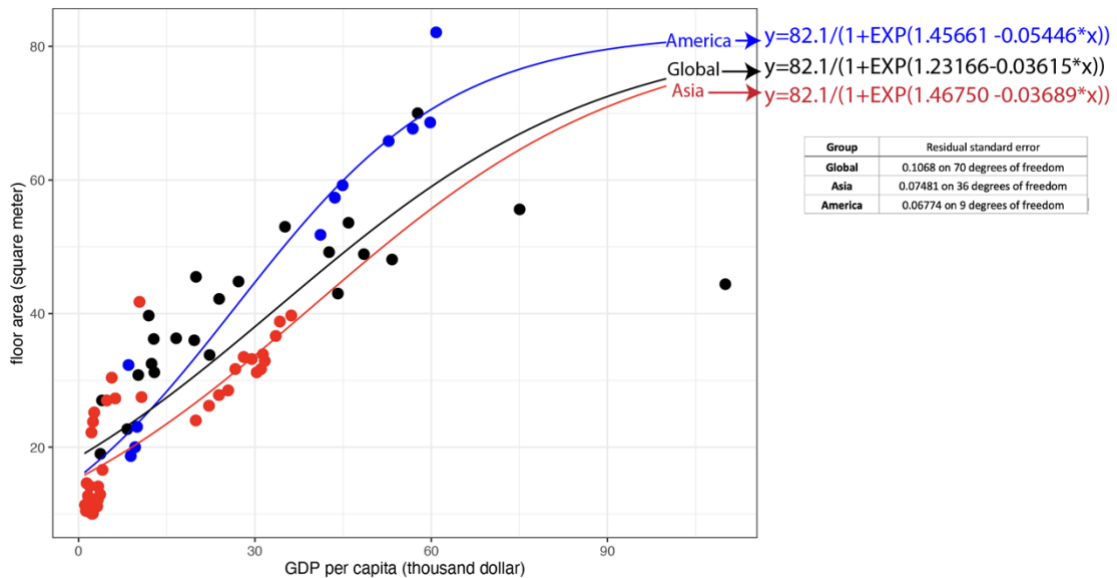

33  
 34 Supplementary Figure 4| The residential floor area per capita as a function of GDP per capita.  
 35 X-ray correspond to the per capita GDP (2015 constant dollars), and Y-ray correspond to the  
 36 residential floor area per capita. Each plot refers to one country in one year. Please see the list  
 37 of countries in Supplementary Table 11. The American countries are in blue and the blue curve  
 38 refers to the floor area project model for American countries. The Asian countries are in red and  
 39 the red curve refers to the floor area project model for Asian countries. The black curve refers  
 40 to the global floor area project model which is fit by all countries worldwide. Due to the data  
 41 availability, African countries adopt the global model.  
 42  
 43

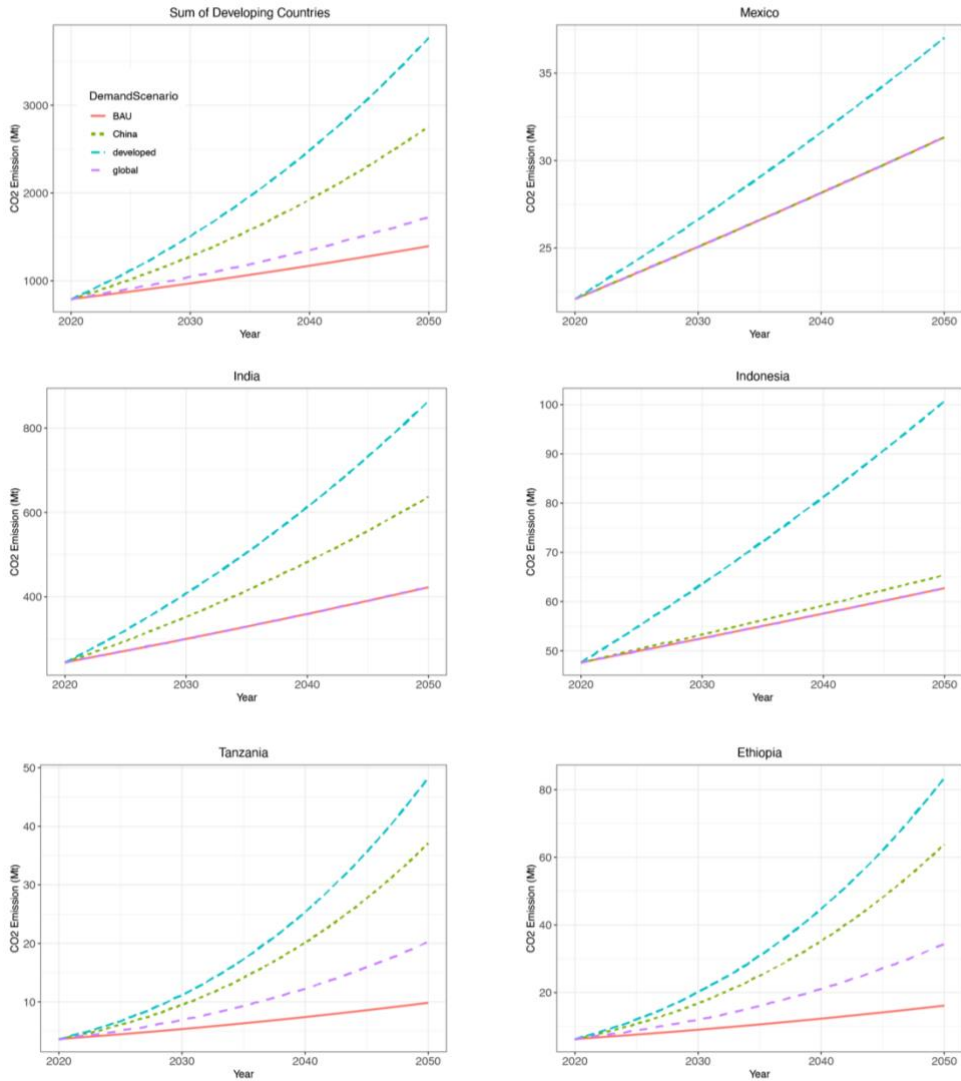

44 Supplementary Figure 5| Annual emissions of sum of developing countries (except China)  
 45 and selected countries over 2020-2050. The line corresponds to different cement  
 46 production scenarios: BAU, global average, China level and developed average scenarios.

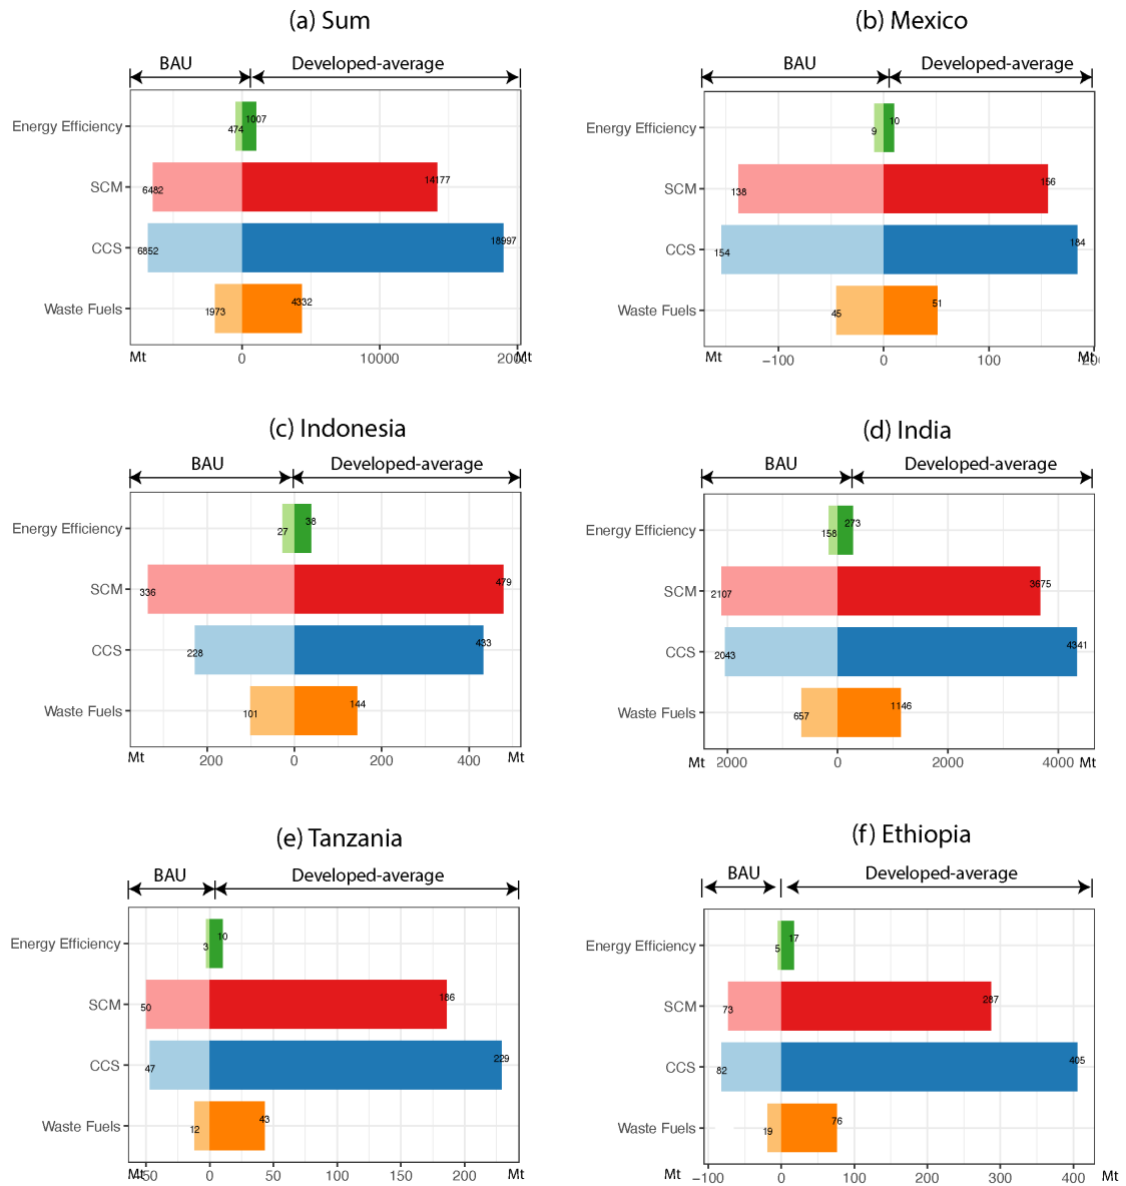

48 Supplementary Figure 6| The emission reduced by four low-carbon measures under different  
 49 cement production scenarios. (a), the emissions reduced by four low-carbon measures under  
 50 BAU and Developed-average cement production scenarios, respectively. (b)-(f), cement  
 51 emissions of the following selected countries under the same scenario combinations: Mexico  
 52 (b), Indonesia (c), India (d), Tanzania (e) and Ethiopia (f).  
 53

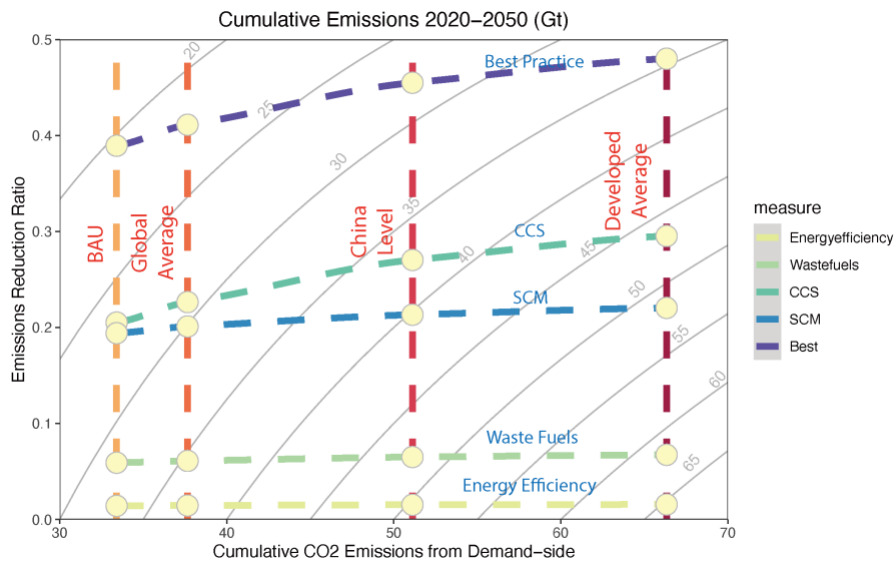

55 Supplementary Figure 7| Cumulative CO<sub>2</sub> emissions from developing countries (except China)  
 56 over 2020-2050 (grey lines of the contours) depend on both cement demand and mitigation  
 57 measures. The dashed vertical lines indicate the cumulative CO<sub>2</sub> emissions driven by the  
 58 different levels of cement demand needed to expand infrastructure, whereas the dashed  
 59 horizontal lines indicate the reduction in cumulative emissions resulting from the application of  
 60 the different mitigation measures. Cumulative CO<sub>2</sub> emissions are therefore calculated by  
 61 multiplying cumulative emissions from demand by the expression 1- emissions reduction ratio  
 62 (where the ratio is defined as the absolute reduction in the cumulative cement emissions divided  
 63 by baseline cumulative cement emissions). The intersection points (the large circles) reflect the  
 64 combination of cement production levels and emission mitigation scenarios.  
 65

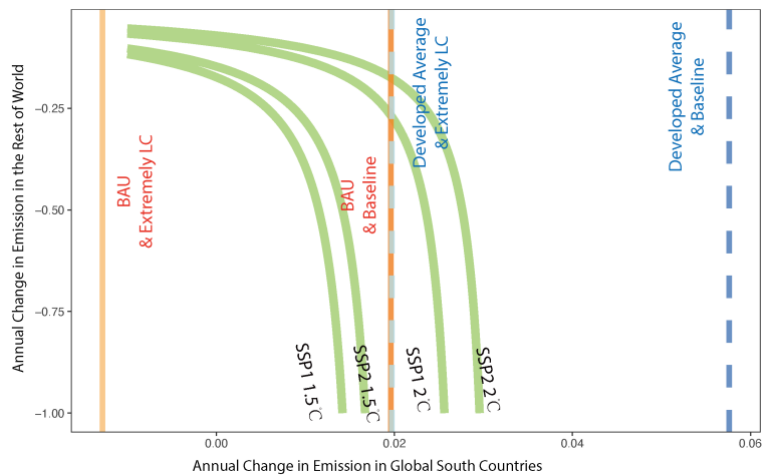

66 Supplementary Figure 8| Carbon emissions budget for cement. The green lines show the  
 67 combinations of the annual changes of CO<sub>2</sub> emissions of the two types of countries to reach  
 68 the 1.5 or 2 °C target. The orange solid vertical lines represent annual growth rate of the  
 69 developing countries (except China) under the BAU cement demand scenarios, with light  
 70 orange for the extremely LC scenario and dark orange the baseline. The blue dashed vertical  
 71 lines represent the same for the Developed Average demand scenario.

(a) Global average scenario (D2)

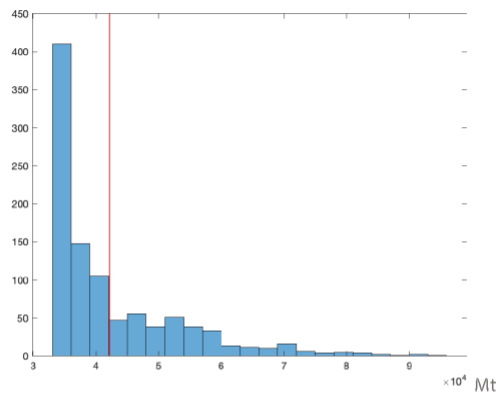

(b) Developed average scenario (D4)

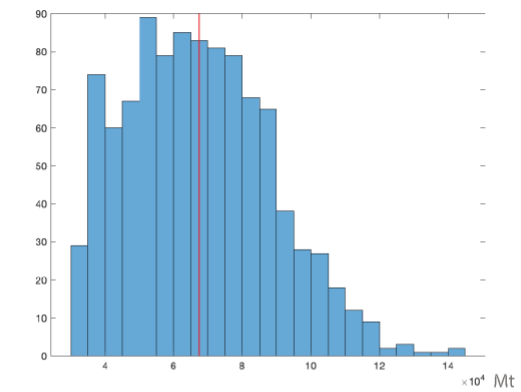

(c) Waste fuels (W2)

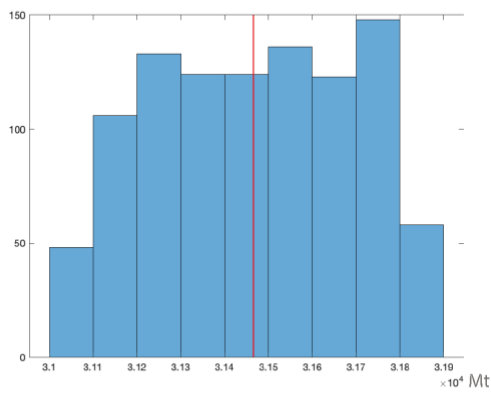

(d) Supplementary cementitious materials (S2)

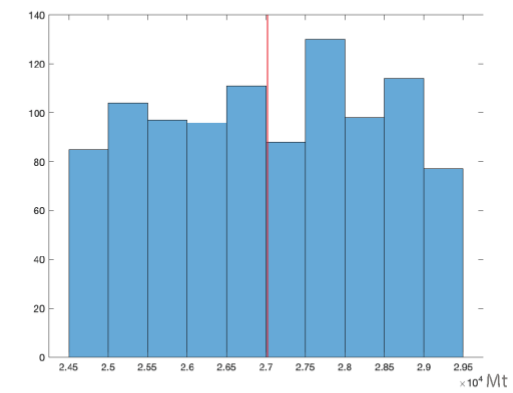

(e) CCS (C2)

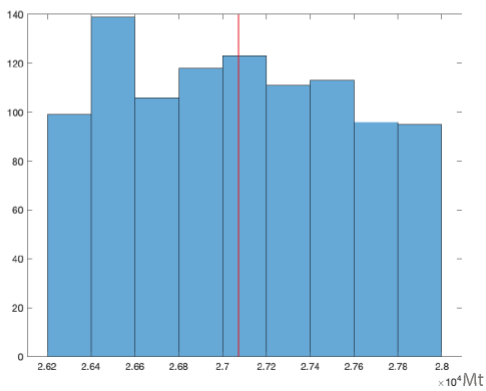

73 Supplementary Figure 9| The probability distribution bar graph. The x axis refers to the  
 74 cumulative emissions (Mt) for the sum of developing countries (except China) over 2020-2050.  
 75 The y axis shows the frequency among 1000 times sampling.  
 76

(a) Global average scenario (D2)

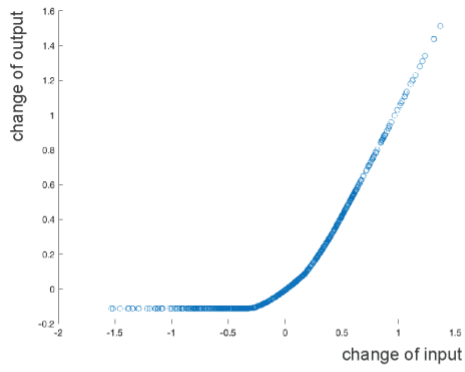

(b) Developed average scenario (D4)

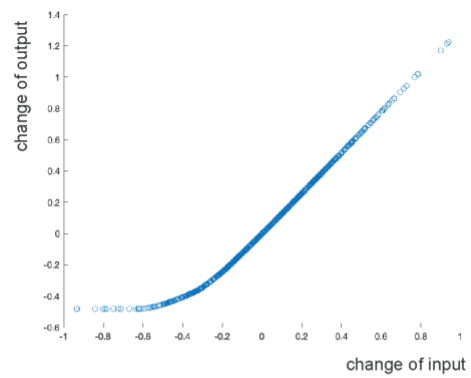

(c) Waste fuels (W2)

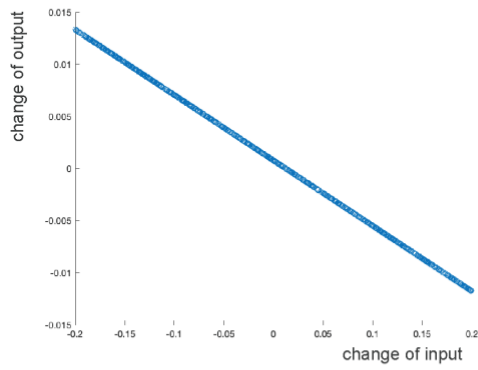

(d) Supplementary cementitious materials (S2)

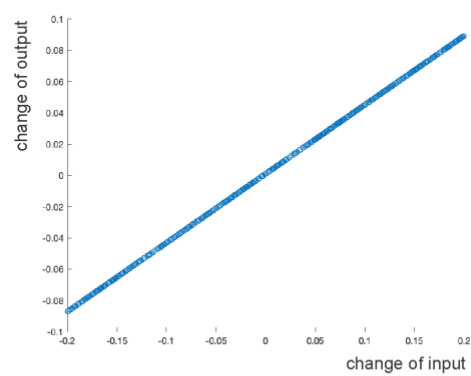

(e) CCS (C2)

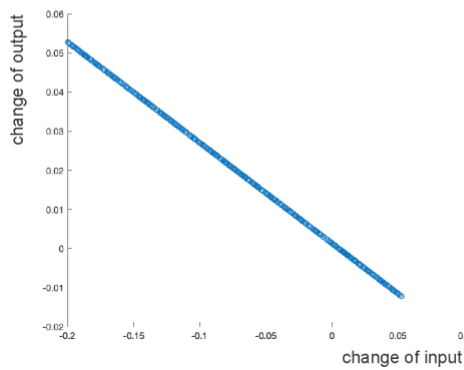

78 Supplementary Figure 10| Scatter plots for change of input variables (x axis) and change of  
 79 output (y axis). a-e refer to global average scenario, developed average scenario, waste fuels,  
 80 supplementary cementitious materials, CCS.



81

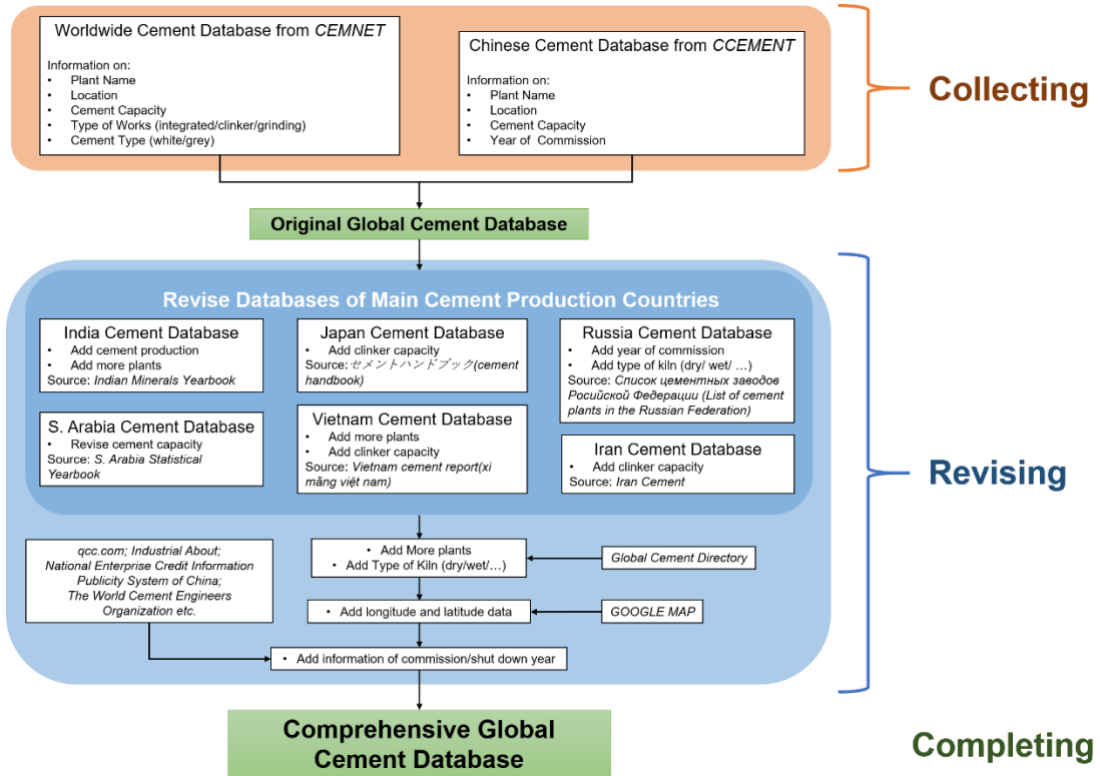

82 Supplementary Figure 11| The description of construction of global cement database.

83

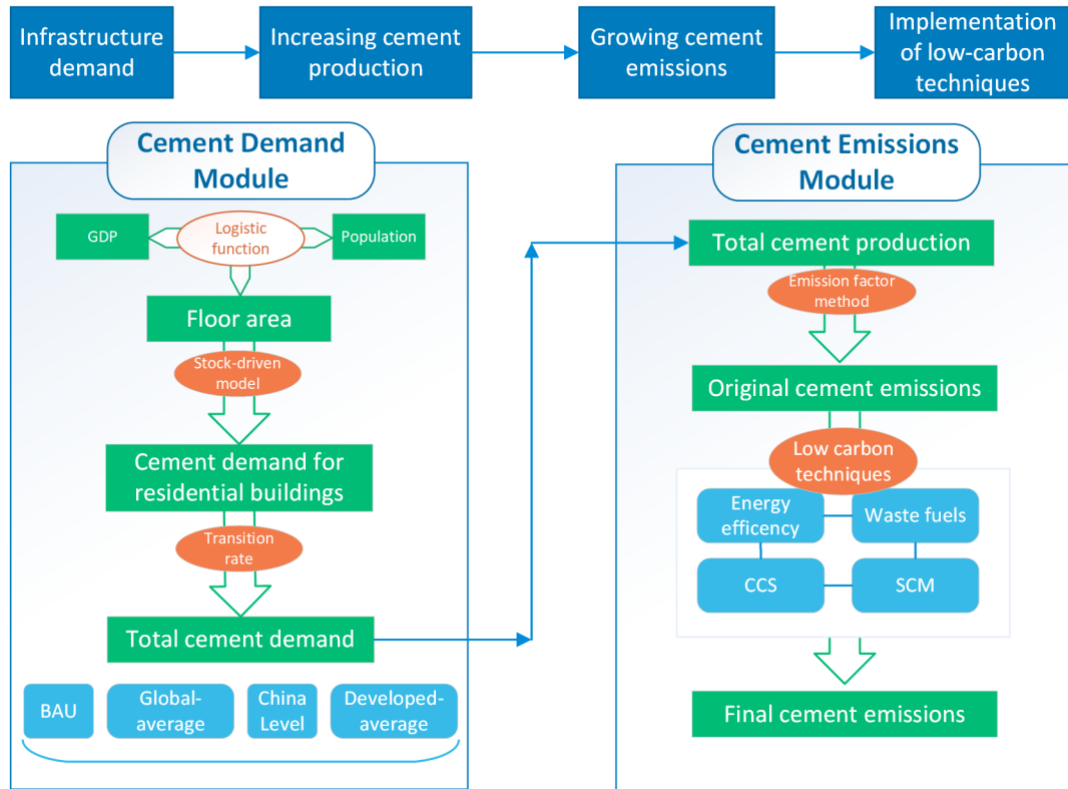

84

85 Supplementary Figure 12| The flow diagram for the scenario analysis in future cement  
86 emissions.

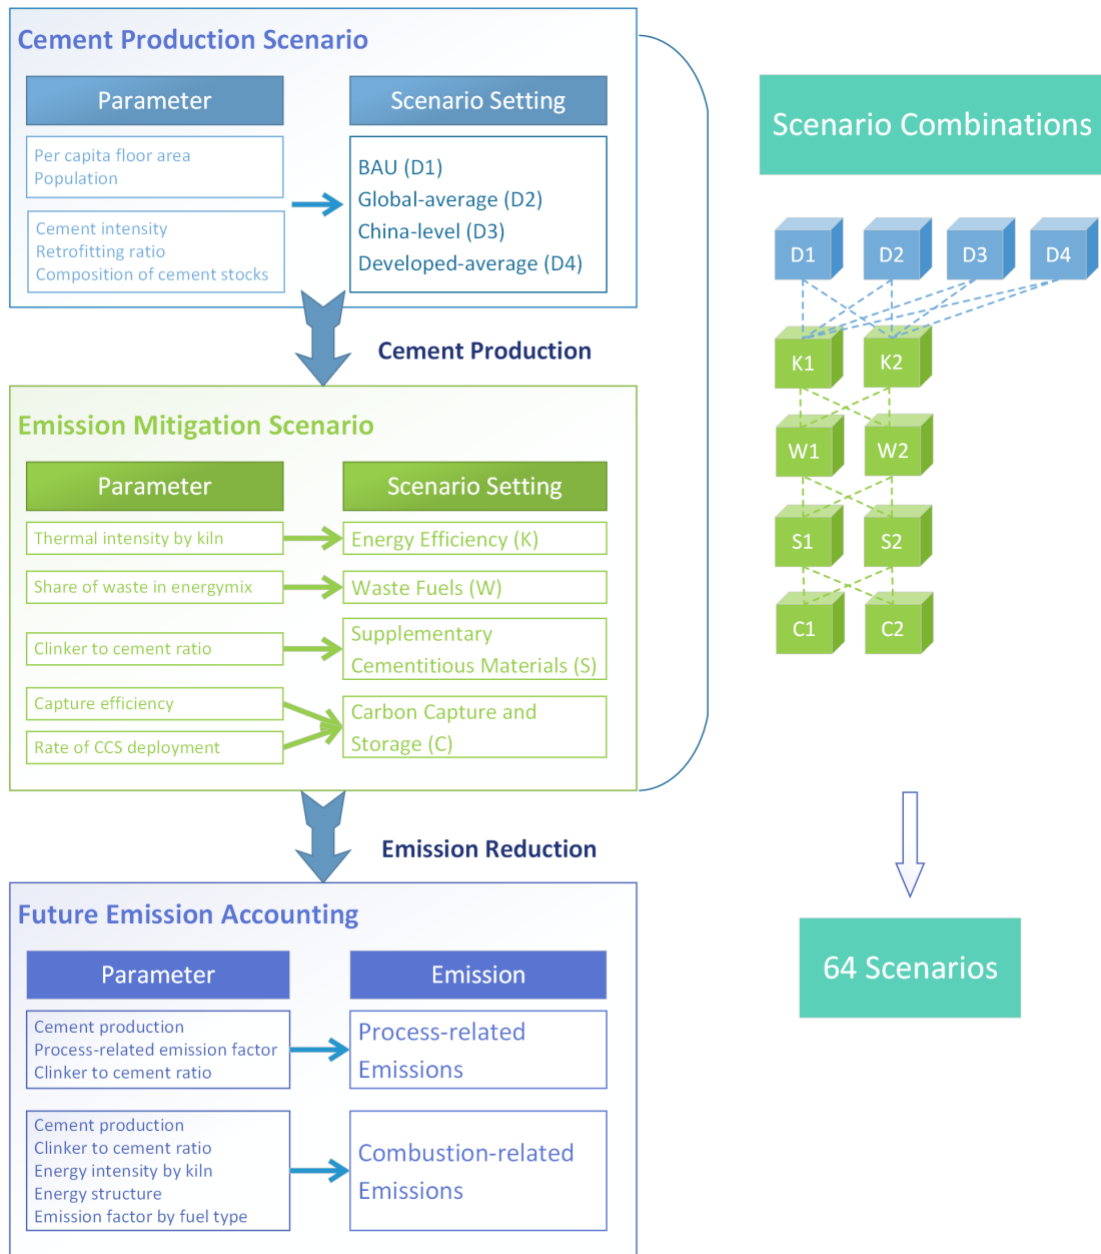

87

88 Supplementary Figure 13| The description of variables and outputs in scenario analysis in future  
89 cement emissions.

90

91

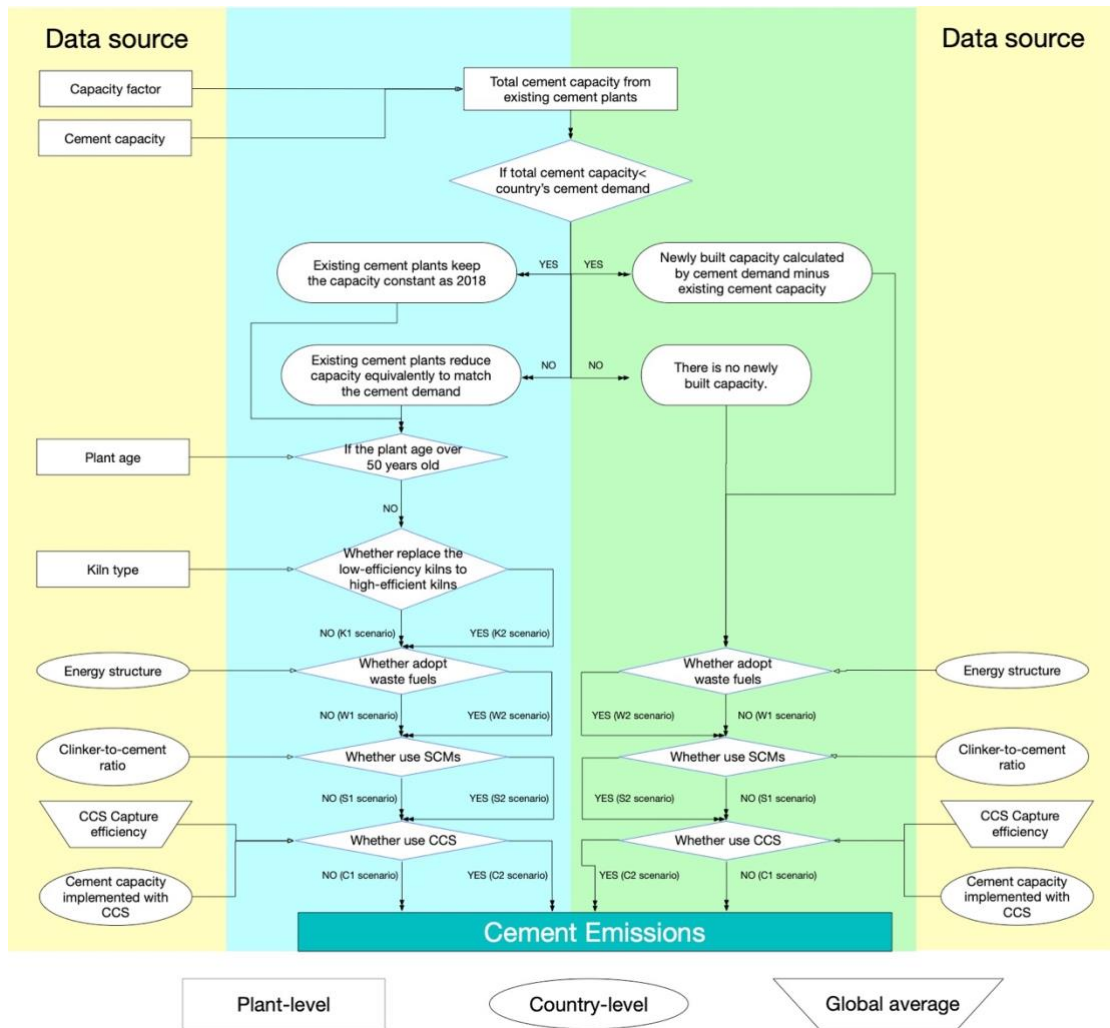

92  
93  
94  
95  
96

Supplementary Figure 14| The methodological illustration about how we integrate mitigation measures in the emissions accounting framework. The figure describes the key steps in the emission mitigation module and the data sources of the migration strategies.

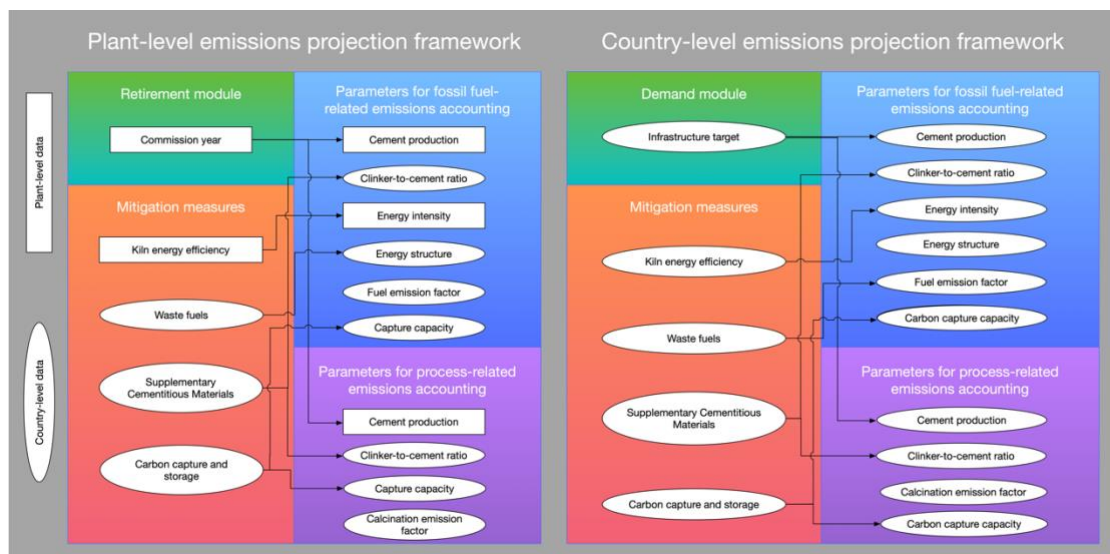

97  
98

Supplementary Figure 15| The illustration of the integrated plant- and country-level emissions



|                 |             |       |
|-----------------|-------------|-------|
| Commission year | Before 1950 | 6.5%  |
|                 | 1950-1969   | 8.1%  |
|                 | 1970-1989   | 9.3%  |
|                 | 1990-1999   | 6.8%  |
|                 | 2000-2009   | 34.1% |
|                 | 2010-2018   | 30.9% |
|                 | Unknown     | 4.2%  |
| Kiln type       | New dry     | 53.2% |
|                 | Dry         | 37.2% |
|                 | Semi-dry    | 0.4%  |
|                 | Semi-wet    | 0.1%  |
|                 | Wet         | 2.2%  |
|                 | Shaft       | 0.0%  |
|                 | Unknown     | 6.9%  |

117

118

Supplementary Table 2| The global cement emissions accounted by literature.

| Year | Accounting scale                          | Results                      | Sources                                     |
|------|-------------------------------------------|------------------------------|---------------------------------------------|
| 2019 | process-, energy- and electricity-related | 2.3 Gt CO <sub>2</sub>       | Global Efficiency Intelligence <sup>4</sup> |
| 2014 | process- and energy-related               | 2.2 Gt CO <sub>2</sub>       | International Energy Agency <sup>5</sup>    |
| 2019 | process- and energy-related               | 2.5 Gt CO <sub>2</sub>       | Chen et al. <sup>6</sup>                    |
| 2015 | process- and energy-related               | 2.2 ~ 2.9 Gt CO <sub>2</sub> | Farfan et al. <sup>7</sup>                  |
| 2018 | process- and energy-related               | 2.1 Gt CO <sub>2</sub>       | This study                                  |
| 2016 | process-related                           | 1.3 Gt CO <sub>2</sub>       | Janssens-Maenhout et al. <sup>8</sup>       |
| 2016 | process-related                           | 1.9 Gt CO <sub>2</sub>       | Le Quéré <sup>9</sup>                       |
| 2018 | process-related                           | 1.50±0.12 Gt CO <sub>2</sub> | Andrew <sup>10</sup>                        |
| 2018 | process-related                           | 1.4 Gt CO <sub>2</sub>       | This study                                  |

119

120

Supplementary Table 3| Description of the data source in estimating cement emissions in 2018.

| Item                        | Source                                                                                                                                                                                                                                                                                                                                                                                                       |
|-----------------------------|--------------------------------------------------------------------------------------------------------------------------------------------------------------------------------------------------------------------------------------------------------------------------------------------------------------------------------------------------------------------------------------------------------------|
| $EF_{calcination,c}$        | Value of 0.4964 t CO <sub>2</sub> / t clinker adopted for Chinese plants <sup>11</sup> ; other country values based on <i>National Inventory Submissions</i> to UNFCCC.                                                                                                                                                                                                                                      |
| $PRO_{cement,c}$            | <i>China Statistical Bulletin</i> provides cement production for China in 2018; <i>USGS</i> provides cement production of other major countries (US, Brazil, Egypt, India, Indonesia, Iran, Japan, South Korea, Russia, Turkey, Vietnam) in 2018; <i>Statistics Canada</i> provides cement production for Canada in 2018; <i>CEMNET Database</i> provides cement production in 2018 for 172 other countries. |
| $R_{clinker\ to\ cement,c}$ | Country-specific data published by International Energy Agency <sup>12</sup> .                                                                                                                                                                                                                                                                                                                               |
| $EI_k$                      | Energy intensity for new dry kilns of 3370.19 MJ/t clinker <sup>13</sup> ; dry kilns with 3550 MJ/t clinker, wet kilns with 4800 MJ/t clinker, semi-dry kilns with 4350 MJ/t clinker, semi-wet kilns with 4350 MJ/t clinker, draft kilns                                                                                                                                                                     |

|                 |                                                                                                                  |
|-----------------|------------------------------------------------------------------------------------------------------------------|
|                 | with 4800 MJ/t clinker, based on European Commission <sup>14</sup> .                                             |
| $S_{i,c}$       | Country-specific data provided by National Inventory Submissions of UNFCCC.                                      |
| $EF_{fuel,i,c}$ | Emission factors collected from <i>Emission Factors for Greenhouse Gas Inventories</i> of US EPA <sup>15</sup> . |

121

122

123 Supplementary Table 4| Representative countries in each group according to age structure and  
124 per capita cement production (ton).

| Group  | Country       | Age structure            |                                                       | Cement production per capita in 2018 ** |
|--------|---------------|--------------------------|-------------------------------------------------------|-----------------------------------------|
|        |               | The rapid growth period* | The share of cement capacity from rapid growth period |                                         |
| Group1 | United States | Before 1970              | 67.6%                                                 | 0.27                                    |
|        | Turkey        | Before 1970              | 36.3%                                                 | 0.90                                    |
|        | Japan         | Before 1970              | 96.8%                                                 | 0.44                                    |
|        | South Korea   | Before 1970              | 52.8%                                                 | 1.07                                    |
|        | Russia        | Before 1970              | 59.6%                                                 | 0.37                                    |
|        | Brazil        | Before 1970              | 28.8%                                                 | 0.25                                    |
|        | Germany       | Before 1970              | 77.6%                                                 | 0.41                                    |
| Group2 | China         | (2000, 2010]             | 64.6%                                                 | 1.67                                    |
|        | Saudi Arabia  | (2000, 2010]             | 24.2%                                                 | 1.76                                    |
|        | UAE           | (1990,2000]              | 40.8%                                                 | 2.24                                    |
| Group3 | India         | (2000, 2010]             | 20.4%                                                 | 0.20                                    |
|        | Vietnam       | (2000, 2010]             | 38.3%                                                 | 0.76                                    |
|        | Iran          | (2000, 2010]             | 32.0%                                                 | 0.70                                    |
|        | Mexico        | (1990,2000]              | 20.8%                                                 | 0.32                                    |
|        | Pakistan      | (1990,2000]              | 38.2%                                                 | 0.17                                    |
|        | Thailand      | (1990,2000]              | 39.2%                                                 | 0.51                                    |
|        | Morocco       | (2000, 2010]             | 26.6%                                                 | 0.40                                    |
| Group4 | Indonesia     | (2010, 2018]             | 59.4%                                                 | 0.26                                    |
|        | Egypt         | (2010, 2018]             | 30.9%                                                 | 0.48                                    |
|        | Nigeria       | (2010, 2018]             | 63.1%                                                 | 0.11                                    |
|        | Nepal         | (2010, 2018]             | 55.2%                                                 | 0.31                                    |
|        | Myanmar       | (2010, 2018]             | 67.0%                                                 | 0.12                                    |
|        | Kenya         | (2010, 2018]             | 59.8%                                                 | 0.12                                    |
|        | Tanzania      | (2010, 2018]             | 53.2%                                                 | 0.09                                    |

125

\* The rapid growth period refers to the period when majority cement plants were established.

126

The period is divided by every ten years: before 1970, 1971-1980, 1981-1990, 1991-2000,

127

2001-2010, 2011-2018.

128 \*\*The country-specific population data is collected from World Bank Database and the country-  
 129 specific cement production data is collected from global database of CEMNET.  
 130  
 131  
 132 Supplementary Table 5| Listing of the countries that are investigated in scenario analysis.

| <b>Country Name</b> | <b>Region</b>   | <b>ISO code</b> | <b>Country Name</b> | <b>Region</b>              | <b>ISO code</b> |
|---------------------|-----------------|-----------------|---------------------|----------------------------|-----------------|
| Cameroon            | Central Africa  | CMR             | Mexico              | Mexico and Central America | MEX             |
| Chad                | Central Africa  | TCD             | Nicaragua           | Mexico and Central America | NIC             |
| Gabon               | Central Africa  | GAB             | Panama              | Mexico and Central America | PAN             |
| Republic of Congo   | Central Africa  | COG             | Argentina           | South America              | ARG             |
| Djibouti            | East Africa     | DJI             | Bolivia             | South America              | BOL             |
| drc                 | East Africa     | COD             | Brazil              | South America              | BRA             |
| Eritrea             | East Africa     | ERI             | Chile               | South America              | CHL             |
| Ethiopia            | East Africa     | ETH             | Colombia            | South America              | COL             |
| Kenya               | East Africa     | KEN             | Ecuador             | South America              | ECU             |
| Madagascar          | East Africa     | MDG             | Paraguay            | South America              | PRY             |
| Rwanda              | East Africa     | RWA             | Peru                | South America              | PER             |
| Tanzania            | East Africa     | TZA             | Uruguay             | South America              | URY             |
| Uganda              | East Africa     | UGA             | Venezuela           | South America              | VEN             |
| Algeria             | North Africa    | DZA             | Cambodia            | East Asia                  | KHM             |
| Egypt               | North Africa    | EGY             | Indonesia           | East Asia                  | IDN             |
| Libya               | North Africa    | LBY             | Laos                | East Asia                  | LAO             |
| Morocco             | North Africa    | MAR             | Malaysia            | East Asia                  | MYS             |
| Sudan               | North Africa    | SDN             | Mongolia            | East Asia                  | MNG             |
| Togo                | North Africa    | TGO             | Myanmar             | East Asia                  | MMR             |
| Tunisia             | North Africa    | TUN             | North Korea         | East Asia                  | PRK             |
| Angola              | Southern Africa | AGO             | Philippines         | East Asia                  | PHL             |
| Malawi              | Southern Africa | MWI             | South Korea         | East Asia                  | KOR             |
| Mozambique          | Southern Africa | MOZ             | Thailand            | East Asia                  | THA             |
| Namibia             | Southern Africa | NAM             | Vietnam             | East Asia                  | VNM             |
| South Africa        | Southern Africa | ZAF             | Afghanistan         | South Asia                 | AFG             |
| Zambia              | Southern Africa | ZMB             | Bangladesh          | South Asia                 | BGD             |
| Zimbabwe            | Southern Africa | ZWE             | Bhutan              | South Asia                 | BTN             |
| Benin               | West Africa     | BEN             | Fiji                | South Asia                 | FJI             |
| Burkina Faso        | West Africa     | BFA             | India               | South Asia                 | IND             |
| Ghana               | West Africa     | GHA             | Iran                | South Asia                 | IRN             |
| Mali                | West Africa     | MLI             | Nepal               | South Asia                 | NPL             |
| Niger               | West Africa     | NER             | Pakistan            | South Asia                 | PAK             |

|                     |                            |     |              |              |     |
|---------------------|----------------------------|-----|--------------|--------------|-----|
| Nigeria             | West Africa                | NGA | Sri Lanka    | South Asia   | LKA |
| Senegal             | West Africa                | SEN | Bahrain      | Western Asia | BHR |
| Syria               | Western Asia               | SYR | Iraq         | Western Asia | IRQ |
| Barbados            | Caribbean                  | BRB | Israel       | Western Asia | ISR |
| Cuba                | Caribbean                  | CUB | Jordan       | Western Asia | JOR |
| Dominican Republic  | Caribbean                  | DOM | Kuwait       | Western Asia | KWT |
| Haiti               | Caribbean                  | HTI | Lebanon      | Western Asia | LBN |
| Jamaica             | Caribbean                  | JAM | Oman         | Western Asia | OMN |
| Puerto Rico         | Caribbean                  | PRI | Qatar        | Western Asia | QAT |
| Trinidad and Tobago | Caribbean                  | TTO | Saudi Arabia | Western Asia | SAU |
| Costa Rica          | Mexico and Central America | CRI | Turkey       | Western Asia | TUR |
| El Salvador         | Mexico and Central America | SLV | UAE          | Western Asia | ARE |
| Guatemala           | Mexico and Central America | GTM | Yemen        | Western Asia | YEM |
| Honduras            | Mexico and Central America | HND |              |              |     |

133

134

135

Supplementary Table 6| Comparison of floor area growth rate between IEA and this study.

| Country/Region              | Annual growth rate of total floor area over 2015-2050 estimated by IEA <sup>16,17</sup> | Annual growth rate of total floor area over 2020-2050 calculated in this study under BAU |
|-----------------------------|-----------------------------------------------------------------------------------------|------------------------------------------------------------------------------------------|
| India                       | 3.8%                                                                                    | 4.0%                                                                                     |
| Other Asia                  | 2.2%                                                                                    | 2.5%                                                                                     |
| Latin America and Caribbean | 2.3%                                                                                    | 1.9%                                                                                     |
| Africa                      | 3.3%                                                                                    | 2.8%                                                                                     |
| Total                       | 2.9%                                                                                    | 2.8%                                                                                     |

136

137

Supplementary Table 7| Descriptions of variables in scenario analysis.

| Module               | Variable              | Source                                                                                                                                     | Level            |
|----------------------|-----------------------|--------------------------------------------------------------------------------------------------------------------------------------------|------------------|
| Cement Demand Module | Per capita floor area | Collected directly as shown in Supplementary Table 11; estimated based on logistic function with per capita GDP when data is not available | Country-specific |
|                      | Population            | Collected from the IIASA database under SSP2 scenario <sup>18-20</sup>                                                                     |                  |
|                      | GDP                   | Collected from the IIASA database under SSP2 scenario <sup>18-20</sup>                                                                     |                  |



|                         |                                                |                                                                                                                                                                                                                                                                                                                                                                                                                                                                     |                  |
|-------------------------|------------------------------------------------|---------------------------------------------------------------------------------------------------------------------------------------------------------------------------------------------------------------------------------------------------------------------------------------------------------------------------------------------------------------------------------------------------------------------------------------------------------------------|------------------|
|                         | Cement intensity                               | Collected from <i>Global Status Report 2018</i> <sup>21</sup> (see Supplementary Table 8)                                                                                                                                                                                                                                                                                                                                                                           | Region-specific  |
|                         | Composition of cement stocks                   | Estimated based on the data of major cement producers <sup>22</sup> (see Supplementary Table 9)                                                                                                                                                                                                                                                                                                                                                                     |                  |
|                         | Demolition rate                                | Collected from <sup>23-26</sup>                                                                                                                                                                                                                                                                                                                                                                                                                                     | Global average   |
| Cement Emissions Module | Cement production of existing cement plants    | In most cases, future cement production of each existing cement plant is calculated by multiplying plant-level cement capacity (from the Global Plant-level Cement Database) by the capacity factor (calculated by Equation (3)). However, for the countries where local production capacity from existing cement plants exceeds the total cement demand of the country, existing cement plants will reduce their capacity equivalently to match the cement demand. | Plant-specific   |
|                         | Cement production of newly built cement plants | Country's new capacity is calculated by country's cement demand (projected by the Cement Demand Module) minus total cement production of existing plants.                                                                                                                                                                                                                                                                                                           | Country-specific |
|                         | Clinker to cement ratio                        | <i>Cement Technology Roadmap 2018</i> <sup>12</sup>                                                                                                                                                                                                                                                                                                                                                                                                                 | Country-specific |
|                         | Energy mix                                     | <i>National Inventory Submissions</i> of UNFCCC <sup>15</sup>                                                                                                                                                                                                                                                                                                                                                                                                       |                  |
|                         | Emission factor of fossil fuels                | <i>Emission Factors for Greenhouse Gas Inventories</i> of US EPA <sup>15</sup>                                                                                                                                                                                                                                                                                                                                                                                      |                  |
|                         | Thermal intensity                              | Determined by the kiln type from Global Plant-level Cement Database                                                                                                                                                                                                                                                                                                                                                                                                 | Plant-specific   |
|                         | Cement capacity equipped with CCS              | 50% of each country's new cement capacity and 10% of each country's installed cement capacity assumed to be implemented with CCS technology                                                                                                                                                                                                                                                                                                                         | Country-specific |
|                         | CCS capture efficiency                         | Efficiency of carbon capture is set as 95% <sup>27</sup>                                                                                                                                                                                                                                                                                                                                                                                                            | Global average   |
|                         | Retirement year                                | Determined by the commissioning year found in Global Plant-level Cement Database                                                                                                                                                                                                                                                                                                                                                                                    | Plant-specific   |

138

139

140

Supplementary Table 8| Data for cement intensity by region.

|  |                              |                              |
|--|------------------------------|------------------------------|
|  | Residential cement intensity | Residential cement intensity |
|--|------------------------------|------------------------------|

|                              | in 2020 (kg/sqm) | in 2050 (kg/sqm) |
|------------------------------|------------------|------------------|
| Central Asia                 | 180              | 180              |
| Former Soviet Union          | 180              | 180              |
| Latin America                | 180              | 180              |
| Middle East and North Africa | 90               | 150              |
| North America                | 60               | 60               |
| South And Pacific Asia       | 180              | 180              |
| Sub-Saharan Africa           | 90               | 150              |
| China                        | 180              | 180              |
| India                        | 180              | 180              |

141

142

143 Supplementary Table 9| Transition rate by region.

| Region              | Transition rate |
|---------------------|-----------------|
| Asia                | 2.4             |
| Former Soviet Union | 4               |
| Latin America       | 3               |
| Rest of the world   | 3               |

144 \*The transition rate is defined as the newly-built cement stocks of non-residential buildings and

145 civil engineering infrastructures divided by newly-built cement stocks of residential buildings.

146

147 Supplementary Table 10| The uncertainty caused by transition rate.

| Scenarios                  | Cumulative cement production over 2020-2050 with constant transition rate (Mt) | Cumulative cement production with transition rate growing by 20% over 2020-2050 (Mt) | Change rate |
|----------------------------|--------------------------------------------------------------------------------|--------------------------------------------------------------------------------------|-------------|
| BAU                        | 55539                                                                          | 60099                                                                                | 8.2%        |
| Global Average scenario    | 62401                                                                          | 67669                                                                                | 8.4%        |
| China Level scenario       | 84691                                                                          | 92279                                                                                | 9.0%        |
| Developed Average scenario | 106577                                                                         | 116443                                                                               | 9.3%        |

148

149

150 Supplementary Table 11| The value and data source for per capita floor area of major countries.

| Country | Per capita floor area (sqm) | Year | Data source |
|---------|-----------------------------|------|-------------|
| Austria | 48.1                        | 2008 | Eurostat    |
| Croatia | 36.2                        | 2008 | Eurostat    |
| Estonia | 36.3                        | 2008 | Eurostat    |
| Greece  | 42.2                        | 2008 | Eurostat    |

|              |      |      |                                                                                                      |
|--------------|------|------|------------------------------------------------------------------------------------------------------|
| Hungary      | 39.7 | 2008 | Eurostat                                                                                             |
| Latvia       | 31.2 | 2008 | Eurostat                                                                                             |
| Lithuania    | 32.5 | 2008 | Eurostat                                                                                             |
| Luxembourg   | 44.4 | 2008 | Eurostat                                                                                             |
| Netherlands  | 53.6 | 2008 | Eurostat                                                                                             |
| Norway       | 55.6 | 2008 | Eurostat                                                                                             |
| Poland       | 30.8 | 2008 | Eurostat                                                                                             |
| Portugal     | 45.5 | 2008 | Eurostat                                                                                             |
| Romania      | 22.7 | 2008 | Eurostat                                                                                             |
| Slovenia     | 33.8 | 2008 | Eurostat                                                                                             |
| Sweden       | 48.9 | 2008 | Eurostat                                                                                             |
| UK           | 43   | 2008 | Eurostat                                                                                             |
| France       | 53   | 2009 | Eurostat                                                                                             |
| India        | 10   | 2014 | <sup>28</sup>                                                                                        |
| Japan        | 23   | 2015 | Japan Ministry of Land, Infrastructure, Transport & Tourism                                          |
| China        | 40.8 | 2016 | China Premium Database's Household Survey                                                            |
| Vietnam      | 22.8 | 2016 | Vietnam Ministry of Construction                                                                     |
| Australia    | 70.0 | 2017 | Point2Homes.com & Shrinkthatfootprint.com                                                            |
| Brazil       | 32.3 | 2017 | Point2Homes.com                                                                                      |
| Germany      | 49.2 | 2017 | Eurostat                                                                                             |
| Malaysia     | 27.5 | 2017 | Valuation and Property Services Department, UNCHS and the World Bank                                 |
| Mexico       | 32.9 | 2017 | Point2Homes.com                                                                                      |
| Spain        | 44.8 | 2017 | Eurostat                                                                                             |
| Sri Lanka    | 16.6 | 2017 | Valuation and Property Services Department, UNCHS and the World Bank                                 |
| Thailand     | 29.7 | 2017 | Valuation and Property Services Department, UNCHS and the World Bank                                 |
| Czechia      | 36   | 2018 | Eurostat                                                                                             |
| Philippines  | 23   | 2018 | Philippine Statistics Authority                                                                      |
| Canada       | 58.3 | 2018 | Natural Resources Canada                                                                             |
| Iran         | 27   | 2019 | Financial Tribune, Eghtesad Online News                                                              |
| US           | 82.1 | 2019 | American Housing Survey (AHS)                                                                        |
| South Korea  | 31.7 | 2018 | Statistics Korea                                                                                     |
| Egypt        | 19   | 2017 | <i>Census Data for Egypt</i>                                                                         |
| Tunisia      | 27   | 2010 | Elaboration d'un Plan pour la Rénovation Thermique et Energétique des Bâtiments Existants en Tunisie |
| Saudi Arabia | 24   | 2017 | Rooftop PV Potential in the Residential Sector of the Kingdom of Saudi Arabia                        |
| Cambodia     | 14.6 | 2020 | Cambodia Socio-Economic Survey                                                                       |

152 Supplementary Table 12| Summary of the calculation methods and basic assumptions in  
 153 mitigation scenario setting.

| Mitigation measure       | Baseline scenario                                                                                                                                   | Mitigation scenario                                                                                                                                                              |                                                                                                                                                                                                                      |                                                                                                                                                                                                                                                                                                                                                                                                                                             |
|--------------------------|-----------------------------------------------------------------------------------------------------------------------------------------------------|----------------------------------------------------------------------------------------------------------------------------------------------------------------------------------|----------------------------------------------------------------------------------------------------------------------------------------------------------------------------------------------------------------------|---------------------------------------------------------------------------------------------------------------------------------------------------------------------------------------------------------------------------------------------------------------------------------------------------------------------------------------------------------------------------------------------------------------------------------------------|
|                          | Basic assumptions                                                                                                                                   | Calculation methods                                                                                                                                                              | Parameter setting of mitigation measure                                                                                                                                                                              | Basic assumptions                                                                                                                                                                                                                                                                                                                                                                                                                           |
| <b>Energy efficiency</b> | <ul style="list-style-type: none"> <li>Existing plants will keep constant as usual.</li> <li>New plants will be equipped with dry kilns.</li> </ul> | <ul style="list-style-type: none"> <li>Retrofitting to dry kilns with higher energy efficiency will lower the thermal intensity.</li> </ul>                                      | <ul style="list-style-type: none"> <li>Existing wet, semi-wet, semi-dry and shaft kilns will be retrofitted to dry kilns before 2030.</li> <li>New cement plants will be built with dry kilns.</li> </ul>            | <ul style="list-style-type: none"> <li>Existing kilns will be retrofitted linearly.</li> <li>All dry kilns would be implemented with the pre-decomposition kiln.</li> <li>The cement plants owning large capacity will be retrofitted earlier than those with low capacity.</li> </ul>                                                                                                                                                      |
| <b>Waste fuels</b>       | <ul style="list-style-type: none"> <li>The energy structure will keep constant as usual.</li> </ul>                                                 | <ul style="list-style-type: none"> <li>The adoption of waste fuels will directly change the energy structure.</li> </ul>                                                         | <ul style="list-style-type: none"> <li>The share of waste fuels in energy structure will be 30% in 2050<sup>12</sup>.</li> </ul>                                                                                     | <ul style="list-style-type: none"> <li>The ratio of waste fuels would increase linearly from the current level of biomass.</li> <li>The increasing share of waste fuels in the energy mix leads to the decreasing share of fossil fuels.</li> </ul>                                                                                                                                                                                         |
| <b>SCMs</b>              | <ul style="list-style-type: none"> <li>The clinker to cement ratio will keep constant as usual.</li> </ul>                                          | <ul style="list-style-type: none"> <li>The adoption of SCMs will directly change the clinker-to-cement ratio.</li> </ul>                                                         | <ul style="list-style-type: none"> <li>The clinker-to-cement ratio will be reduced to 0.60 in 2050<sup>12</sup>.</li> </ul>                                                                                          | <ul style="list-style-type: none"> <li>The clinker-to-cement ratio will linearly decrease from the current level to the target.</li> </ul>                                                                                                                                                                                                                                                                                                  |
| <b>CCS</b>               | <ul style="list-style-type: none"> <li>There is no CCS application.</li> </ul>                                                                      | <ul style="list-style-type: none"> <li>Calculate the quantity of CO<sub>2</sub> captured by multiplying the capture efficiency and the total emissions<sup>7,29</sup></li> </ul> | <ul style="list-style-type: none"> <li>The capture efficiency is 95%<sup>30</sup>.</li> <li>50% of future new cement capacity and 10% of existing cement capacity will be equipped with CCS<sup>31</sup>.</li> </ul> | <ul style="list-style-type: none"> <li>Deployment of CCS starts in 2025<sup>17</sup>, and the retrofitting of existing plants would be completed before 2030.</li> <li>New cement capacity would be equipped with the oxy-fuel technology and existing cement capacity with the post-combustion technology<sup>32</sup>.</li> <li>Cement plants with larger capacity will be retrofitted earlier than those with lower capacity.</li> </ul> |

154  
 155 Supplementary Table 13| List of assumptions on carbon capture efficiency for CCS  
 156 technology in cement industry from the literature.

| Carbon capture efficiency                             | CCS Technology                                                                      | Source            |
|-------------------------------------------------------|-------------------------------------------------------------------------------------|-------------------|
| >90%                                                  | Amine scrubbing, full oxy-fuel combustion, calcium looping                          | ref <sup>33</sup> |
| Assume 40%, 60%, 80% and 100% for different scenarios | Not mentioned                                                                       | ref <sup>34</sup> |
| Assume 63%, 85%, 100%                                 | Oxy-fuel combustion, amine scrubbing, calcium looping post-combustion, respectively | ref <sup>35</sup> |
| Assume 90%                                            | Post-combustion                                                                     | ref <sup>36</sup> |
| Assume 90%                                            | Oxy-fuel combustion                                                                 | ref <sup>37</sup> |

|                    |                                                       |                      |
|--------------------|-------------------------------------------------------|----------------------|
| Assume 90%         | Calcium looping post-combustion                       | ref <sup>38</sup>    |
| Assume 74% and 61% | Post-combustion and oxy-fuel combustion, respectively | ref <sup>29</sup>    |
| Assume 78% and 61% | Post-combustion and oxy-fuel combustion, respectively | ref <sup>39</sup>    |
| Assume 80%         | Not mentioned                                         | ref <sup>40,41</sup> |
| Assume 86%         | Oxy-fuel combustion capture CCS                       | ref <sup>42</sup>    |

157

158

159

Supplementary Table 14| List of the uncertain variables included in the simulations and their statistical distributions

| Factor                                        | Default | Distribution | Range                        |
|-----------------------------------------------|---------|--------------|------------------------------|
| <b>Cement production scenarios</b>            |         |              |                              |
| <b>Global-average floor area (sqm/cap)</b>    | 27.6    | Normal       | ( $\mu,\sigma$ )=(27.6,13.6) |
| <b>Developed-average floor area (sqm/cap)</b> | 47.9    | Normal       | ( $\mu,\sigma$ )=(47.9,14.2) |
| <b>Emission mitigation scenarios</b>          |         |              |                              |
| <b>Share of waste fuels (%)</b>               | 30      | Uniform      | [24, 36]                     |
| <b>Clinker to cement ratio (%)</b>            | 50      | Uniform      | [40, 60]                     |
| <b>The efficiency of carbon capture (%)</b>   | 95      | Uniform      | [76,100]                     |

160

161

162

Supplementary Table 15| Descriptive statistics of output cumulative emissions (Mt) over 2020-2050 under different variables.

| Factor                                            | Mean  | Median | Percentile (10%, 90%) | Range (min, max) |
|---------------------------------------------------|-------|--------|-----------------------|------------------|
| <b>Cement production scenarios</b>                |       |        |                       |                  |
| <b>Global-average</b>                             | 42147 | 37777  | (33429, 57691)        | (33429,94594)    |
| <b>Developed-average</b>                          | 67450 | 65901  | (39840, 95280)        | (33429,143070)   |
| <b>Emission mitigation scenarios</b>              |       |        |                       |                  |
| <b>Waste fuels</b>                                | 31466 | 31469  | (31155, 31772)        | (31065, 31852)   |
| <b>Supplementary Cementitious Materials (SCM)</b> | 27018 | 27029  | (25063, 28880)        | (24581, 29324)   |
| <b>Carbon capture and storage (CCS)</b>           | 27071 | 27061  | (26402,27794)         | (26230, 27956)   |

163

164

Supplementary Table 16| The uncertainty of adopting region-specific floor area projection model.

| Model                  | Ratio of change |
|------------------------|-----------------|
| Global-average model   | [-17%, +18%]    |
| America-specific model | [-27%, +23%]    |
| Asia-specific model    | [-19%, +21%]    |

165

166 Supplementary Table 17| The change of thermal energy intensity by kiln type over 1990-  
167 2016.

| Kiln type                                    | 1990-2000 | 2000-2010 | 2010-2016 |
|----------------------------------------------|-----------|-----------|-----------|
| Dry kiln with preheater and precalciner kiln | -5.9%     | -0.4%     | 0.0%      |
| Dry kiln with preheater without precalciner  | -4.5%     | 0.3%      | 1.0%      |
| Semi-wet/semi-dry kiln                       | -5.6%     | 1.2%      | 7.3%      |
| Wet/Shaft kiln                               | -4.9%     | -0.4%     | -1.3%     |

168 Source: World Business Council for Sustainable Development (WBCSD) <sup>43</sup>

### 169 **Supplementary Notes**

170 Note S 1| Descriptions of countries shown in the Figure 2 in the main text.

171 We find that these countries can represent a wide range of developing countries in terms of  
172 future cement emissions pattern. These countries have large population, but different  
173 performances in economic development, geological sites, and cement industry.

174

175 **Mexico** Mexico is located in southern America. It is the world's 13th-largest country by area  
176 and the 10th-most-populous country. As a newly industrialized and developing country, high in  
177 the Human Development Index, its large economy and population, cultural influence, and  
178 steady democratization make Mexico a regional and middle power which is also identified as  
179 an emerging power.

180 Mexico is the 11th largest cement producing country in the world producing 51 million tonne (Mt) of  
181 cement in 2021. Around 87 % of the energy used in Mexico's cement industry is fossil fuels  
182 dominated by petroleum coke, natural gas and coal.

183 **India** India is in South Asia, connected by land to countries such as Pakistan, China, Nepal,  
184 and Bhutan, etc. According to the latest census by the Bureau of Statistics of India, the country  
185 has a population of 1.38 billion, making it the second most populous country in the world after  
186 China. India is the sixth largest economy in the world in terms of nominal GDP, with a GDP of  
187 \$2.623 billion in current prices in 2020<sup>44</sup>. Due to its huge population, its per capita GDP is only  
188 US\$1,900, which is at the level of a low-income country in the world.

189 India is the second largest producer of cement in the world. It accounts for more than 7% of the  
190 global installed capacity. India has a lot of potential for development in the infrastructure and  
191 construction sector and the cement sector is expected to largely benefit from it. Some of the  
192 recent initiatives, such as development of 98 smart cities, is expected to provide a major boost  
193 to the sector.

194 Aided by suitable Government foreign policies, several foreign players such as Lafarge-Holcim,  
195 Heidelberg Cement, and Vicat have invested in the country in the recent past. A significant  
196 factor which aids the growth of this sector is the ready availability of raw materials for making  
197 cement, such as limestone and coal.

198 **Indonesia** The Republic of Indonesia, is located in southeastern Asia, straddling the equator,  
199 and bordering Papua New Guinea, East Timor, and Malaysia. Indonesia is the world's largest  
200 archipelago country, consisting of approximately 17,508 islands between the Pacific and Indian

201 Oceans, with a land area of approximately 190.4 km<sup>2</sup>. In 2021, Indonesia has a total population  
202 of 268 million, ranking fourth in the world. Indonesia has enjoyed relatively steady economic  
203 growth since the 1960s, making significant progress in agriculture, energy extraction and  
204 textiles, making it the largest economy in the Association of Southeast Asian Nations (ASEAN).  
205 In 2020, Indonesia's gross domestic product calculated at comparable prices is US\$1.06 trillion,  
206 ranking 15th in the world. Although its total GDP is large, Indonesia's per capita GDP is still  
207 below the global average, making it a low-and middle-income country in the world.

208 Cement consumption is still low in Indonesia with per capita cement production at  
209 approximately 300 kilograms. This figure is much lower than cement consumption in its peers  
210 Vietnam. A low per capita cement consumption figure implies that infrastructure development  
211 is still underdeveloped in Southeast Asia's largest economy. The cement sector's long-term  
212 picture is positive with the continuation of a rapidly expanding middle class. With rising per  
213 capita GDP people want to live in a better house. The country's total installed production  
214 capacity expanded from 37.8 million tons in 2010 to over 100 million tons in 2016, while  
215 domestic sales surged from 40 million tons to an estimated 60 million tons over the same period.  
216 The Indonesian government, under the leadership of President Joko Widodo, has given more  
217 attention to infrastructure development in order to boost the country's economic growth in a  
218 productive way. Funds allocated to infrastructure spending has risen markedly in recent years.

219 **Tanzania** Tanzania is an East African country located in the Great Lakes Region of Africa.  
220 Tanzania's economy has grown at an average annual rate of 6.3% from 2010 to 2018. In 2019,  
221 Tanzania's GDP was US\$ 63.2 billion, and its population was 58 million.

222 Since 2014, Tanzania has dramatically increased cement production. Between 2018 and 2019  
223 alone, cement production increased from 4.5 million metric tons to roughly 6.5 million metric  
224 tons an increase of 44.5 percent.

225 **Ethiopia** Ethiopia is a landlocked country located in the Horn of Africa. It is the 13th-most  
226 populous country in the world, the 2nd-most populous in Africa after Nigeria, and the most  
227 populated landlocked country on Earth.

228 Ethiopia's cement industry has witnessed substantial growth in the past decade With nearly  
229 16.5 million tonnes of cement capacity and 10% average growth in annual consumption,  
230 Ethiopia is among the top cement producers in sub-Saharan Africa. Only Nigeria and South  
231 Africa rival it.

232

## 233 **Supplementary Methods**

### 234 **Construction of Global Cement Database**

#### 235 **Historical Data to Construct Global Cement Database**

236 Global cement database is constructed mainly based on the global database of CEMNET. *The*  
237 *13<sup>th</sup> Global Cement Report* and online database of cement plants published by CEMNET  
238 contain listings of 2189 cement plants worldwide (excluding China), and give latest cement  
239 plant information including plant name, geographical location, cement capacity, type of works  
240 and cement type. For China, the *National Cement Production Line Atlas 2019* published by  
241 *CCEMENT* provides information on Chinese cement plants, including plant name, geographical  
242 location, capacity and year of commissioning.

243 In order to provide more specific and accurate data, other global and local databases have  
244 been consulted in compiling the comprehensive global cement database. Local databases for

245 leading global cement producing countries including India, Russia, Saudi Arabia, Vietnam, Iran  
 246 and Japan are collected and supplemented in the original global cement database (see details  
 247 in Supplementary Figure 11). Data from the *Global Cement Directory 2019* published by *Global*  
 248 *Cement* is adopted to provide more detailed cement plant information and supplement the  
 249 information on kiln types.

250  
 251 The final comprehensive global cement plant database contains 3094 cement plants, of which  
 252 there are 3020 integrated plants and 74 clinker plants. As this study considers only direct  
 253 (Scope 1) emissions from cement plants including process- and energy-related emissions. The  
 254 database gives information on plant names, location sites, operators, host countries, cement  
 255 capacities, type of works (integrated or clinker) for all cement plants, and year of commissioning,  
 256 cement type (grey or white) and type of kiln (dry, semi-dry, semi-wet, wet, shaft and new dry  
 257 kiln) for the majority of plants, and clinker capacity and cement production for some plants.

258

## 259 **Estimation of CO<sub>2</sub> emissions from cement**

### 260 ***Process-related Carbon Emissions***

261 Process-related carbon dioxide emissions represent the CO<sub>2</sub> emitted during the calcination of  
 262 raw meal, in which the limestone is heated to produce lime and carbon dioxide. Existing studies  
 263 tend to use clinker production to calculate the cement process-related emissions, to achieve  
 264 more accurate emission accounts for the cement industry<sup>45</sup>. Therefore, in this study, the  
 265 process-related carbon emissions are estimated as clinker production multiplied by the  
 266 corresponding emission factors; see Equation (1)<sup>46</sup>:

$$267 \quad E_{process,a,t} = AD_{clk,a,t} * EF_{calcination,c} \quad (1)$$

268 where  $AD_{clk,a,t}$  refers to the clinker production of the plant  $a$  in year  $t$ ,  $EF_{calcination,c}$  represents  
 269 the country-level emission factor for the clinker production during the calcination of raw meal,  
 270 that is, the CO<sub>2</sub> emitted during per unit production of clinker.

271 In the absence of clinker production data, we estimated this by using clinker to cement ratios  
 272 and capacity factors ( $CF_{c,t}$ , that is, the utilization rates) on country-specific, shown as Equation  
 273 (2).

$$274 \quad AD_{clk,a,t} = CAP_{cmt,a,t} * CF_{c,t} * R_{clk\ to\ cmt,c} \quad (2)$$

275 In the above equation,  $CAP_{cmt,a,t}$  refer to cement capacity of the plant  $a$  and  $R_{clk\ to\ cmt,c}$   
 276 represents the clinker-to-cement ratio of the country or region  $c$ . The  $CF_{c,t}$  is calculated as  
 277 following:

$$278 \quad CF_{c,t} = \frac{PRO_{cmt,c,t}}{CAP_{cmt,c,t}} \quad (3)$$

279 Where  $CAP_{cmt,c,t}$  is the total cement production capacity in a country or region  $c$  in year  $t$ ,  
 280  $PRO_{cmt,c,t}$  represents the cement production in country or region  $c$ . If  $PRO_{cmt,c}$  is absent, the  
 281 global average capacity factor is adopted.

### 282 ***Energy-related Emissions***

283 The direct energy-related CO<sub>2</sub> emissions are estimated using Equation( 4 ): in year  $t$

$$284 \quad E_{combustion,a,t} = AD_{clk,a} * EI_k * \sum(S_{i,c} * EF_{fuel,i,c}) \quad (4)$$

285 Where  $EI_k$  denotes energy intensity (J/kg clinker) of kiln type,  $k$ ;  $S_{i,c}$ , and  $EF_{fuel,i,c}$  represent  
 286 the share, and emission factor of the  $i$ th type of fuel in country or region  $c$  where the plant  $a$  is  
 287 located; and  $i$  represents different types of fossil fuel used to supply energy, including oil, coal



288 and natural gas.

289

## 290 **Categorization of countries based on the plant-level cement database**

291 This study categorized the global countries into four groups according to their age structure  
292 of cement plant and per capita cement production. We divide the period by every ten years  
293 and identify the rapid growing period of each country when the majority of cement capacity  
294 were built (as shown in Table S 4). The countries that witness the rapid growing of cement  
295 capacity before 1990 are categorized into the Group 1, while the countries whose rapid  
296 growing period is 2011-2018 are categorized into the Group 4. The rest countries are  
297 categorized as Group 2 or Group 3, which are differentiated by the per capita cement  
298 production. To be specific, China, Saudi Arabia and the United Arab Emirates are defined  
299 as Group 2 countries, because their cement production per capita (1.67, 1.76, 2.24 ton,  
300 respectively) is significantly higher than other countries with the average of 0.49 ton.

301

302

## 303 **Scenario analysis on Future Cement Emissions**

### 304 **Description of Scenario Analysis**

305 To evaluate future cement CO<sub>2</sub> emissions in developing countries, we propose two scenario  
306 sets (tier 1 and tier 2) that correspond to the different level of cement production and emissions  
307 mitigation options respectively. More specifically, Tier 1 scenarios represent the estimated  
308 cement production based on different levels of cement production to expand the built  
309 environment. Tier 2 scenarios present the commonly discussed low carbon measures in cement  
310 industry, which consist of thermal efficiency improvement, waste fuels, carbon capture and  
311 storage and supplementary cementitious materials<sup>47</sup>. We treat each scenario set as an  
312 individual variable in the model, such that we will have five variables. We quantify the mitigation  
313 potentials by using different combinations of five variables and to yield 64 scenarios (*D, K, W,*  
314 *S, C, see details in the following*).

315 We focus on all developing countries (except for China), which are listed in *World Economic*  
316 *Situation Prospects* published by United Nations<sup>48</sup>. China is excluded because its cement  
317 production already peaked in 2014<sup>45,49</sup> and more attention should be paid to countries where  
318 the vast majority of future growth will occur and which have been relatively neglected.

### 319 **Tier 1: Cement Production Scenarios.**

320 In this study, projection of cement demand is linked to per capita floor area<sup>50</sup> and population  
321 growth. Considering the relative cost of long-distance transport, cement is mostly locally  
322 produced and locally consumed<sup>51</sup>. Therefore, in this study we assume all domestic cement  
323 demand will be always met by local production. When total cement demand in the country or  
324 region exceeds total production capacity of existing cement plants, more cement plants are  
325 built to satisfy the increasing cement demand. We define four scenarios of cement production  
326 labeled D1 through D4, where D stands for 'Potential Cement Demand', representing varying  
327 degrees of possible future infrastructure growth. The moderate scenario D1 corresponds to  
328 economic development under the SSP2<sup>19</sup>, while the most ambitious D4 is close to the housing  
329 condition under the SSP5<sup>19</sup>. The average per capita floor area for all developing countries under

330 D4 (48 sqm) is close to the average level estimated by SSP5 (46 sqm)<sup>18-20</sup>. To be specific,  
331 **BAU(D1)**: anticipates that infrastructure will grow according to the speed of GDP per capita  
332 by country under the SSP2. In general, the average growth rate of per capita floor area  
333 across developing countries is 62% over 2020-2050.  
334 **Global Average (D2)**: building on the BAU D1, all countries which do not currently meet  
335 a level of 29 m<sup>2</sup> floor area per person will accelerate linearly construction to achieve this  
336 target in 2050. This scenario means that, some countries will accelerate the expansion of  
337 construction in order to catch up with those in the same group that are more advanced so  
338 that in 2050 all countries will reach the average level of global countries' housing conditions  
339 in 2020. The average growth rate of per capita floor area for all developing countries is 86%  
340 over 2020-2050.  
341 **China Level (D3)**: similarly, extending D2, all countries that do not currently meet the level  
342 of 40 m<sup>2</sup> floor area per person will accelerate to achieve this target in 2050. In this scenario  
343 means that all countries will reach the 2020 level of China in housing conditions. The  
344 average growth rate of per capita floor area for all developing countries is 121% over 2020-  
345 2050.  
346 **Developed Average (D4)**: finally, extending ambition even further, countries that do not  
347 currently meet the level of 47 m<sup>2</sup> floor area per person will accelerate to achieve this target  
348 by 2050. In this scenario, all countries will reach the average 2020 level of developed  
349 countries in housing conditions. The average growth rate of per capita floor area for all  
350 developing countries is 151% over 2020-2050.

351

## 352 **Tier 2: Mitigation Scenarios**

353 To date, proposed roadmaps for carbon reduction in the cement sector <sup>7,47,52-54</sup> present different  
354 decarbonization pathways. The most prominent approaches include: energy efficiency  
355 improvement, fuel substitution, replacing the clinker with cementitious materials, increasing  
356 production of blended cements, and removing CO<sub>2</sub> from the flue gas. Existing literature  
357 provides important evidence-based parameters. We decide to adopt the technical parameters  
358 proposed by IEA <sup>12,31</sup> as the input for our scenario analysis, which are more reliable and widely  
359 accepted. Also, the mitigations options described by Miller et al. are also fully considered when  
360 setting the parameters<sup>47</sup>. Energy penalties of low carbon measures are not considered in  
361 emission mitigation assessment due to the emission accounting scope.

362 We consider four types of low-carbon solutions in order to analyze their emissions mitigation  
363 potential, including carbon capture and storage (CCS) technologies, supplementary  
364 cementitious materials (SCMs), using waste fuels and improving kiln energy efficiency.

365 We treat each scenario set as an individual variable in the model, such that we will have four  
366 variables in these scenario sets (*K*, *W*, *S*, *C*). The baseline emission refers to the mitigation  
367 scenario of the combination of measures *K*<sub>1</sub>*W*<sub>1</sub>*S*<sub>1</sub>*C*<sub>1</sub> and the extremely low carbon refers to the  
368 mitigation scenario *K*<sub>2</sub>*W*<sub>2</sub>*S*<sub>2</sub>*C*<sub>2</sub>.

369

### 370 **Scenario Set 1: Kiln Energy Efficiency (K).**

371 Energy-efficient technologies can be divided into two types according to the stage of the  
372 process. One type is used during raw materials preparation and the finishing of cement  
373 products, including measures such as substitution of ball mills, efficient transportation systems

374 and energy-efficient separators. The other type is used during clinker production, including  
375 refractory improvements in the kiln, energy management and process control systems,  
376 improvements in the kiln combustion system, clinker cooler, etc. The literature designs the  
377 scenario of energy efficient technology with retrofitting kilns by different time, for instance,  
378 phasing out all shaft kilns 2020 for the reference scenario, 2015 for the efficiency scenario, and  
379 2011 for the best practice scenario<sup>55</sup>.

380 In our study, this scenario set corresponds to improving kilns' energy efficiency to improve  
381 energy performance levels when economically available.

382 K1: existing cement plants will keep constant as usual and all newly-built cement plants  
383 will be equipped with dry kilns. K1 is in line with the current situation.

384 K2: existing kilns that are not planned to retire before 2050 will be retrofitted to dry kilns  
385 before 2030 linearly. Newly-built cement plants will be equipped with dry kilns. All dry kilns  
386 would be implemented with the pre-decomposition kiln to increase the efficiency.

387

### 388 **Scenario Set 2: Waste Fuels (W)**

389 Fuel-switching processes aim to replace carbon-based thermal sources (such as coal) with  
390 greener (lower carbon) thermal sources such as natural gas, biomass or biogenic fuels. The  
391 fuel used in a kiln contributes approximately 40% of CO<sub>2</sub> emissions. Ideally, if an almost-zero  
392 carbon emitting fuel were used in place of a carbon-based fuel, the emissions could be reduced  
393 by almost 40%. The cement industry could use a variety of delivered waste materials to provide  
394 heat for its kilns, including old tires (whole or processed), municipal solid waste, scrap fabrics,  
395 paints, and inks. Most such fuels are principally derived from the onsite production processes  
396 and cost little or nothing to use, lowering overall fuel costs by displacing purchased fuels. Using  
397 solid waste fuels also decreases the volume of waste disposal needed, lowering disposal cost  
398 for manufacturers. According to the reference carbon emissions reduction scenario proposed  
399 by IEA, the share of alternative fuels will grow to 30% by 2050, which include biomass, biogenic  
400 and non-biogenic waste sources. Since this study only accounts for the fossil fuel-related  
401 emissions in terms of CO<sub>2</sub> emissions generated from combustion, biomass and waste are  
402 considered neutral.

403 However, alternative fuels depend on availability of feedstock, climate and location. Alternative  
404 fuels could also affect product quality and refractory lining in cement kiln as they can retain  
405 impurities or pollutants if not treated and prepared carefully<sup>56</sup>. Also, it should be noticed that  
406 adoption of waste fuels might require additional thermal energy input. A lower calorific value as  
407 well as high chlorine content will possibly increase the specific fuel energy demand per tonne  
408 of clinker, thus comes with energy penalties<sup>32</sup>. In this study, future alternative fuels is assumed  
409 to be selected based on the adequate calorific values as well as other different criteria such as  
410 physical criteria (e.g. potential for air entrainment), chemical criteria (e.g. chlorine, sulphur,  
411 alkali and phosphate content), to ensure that kiln operation and product quality meet business-  
412 as-usual standards<sup>57</sup>.

413 W1: without adoption of alternative fuels.

414 W2: use 30% alternative fuels until 2050<sup>12</sup>. The ratio of alternative fuels in the energy mix  
415 is assumed to increase linearly from the current level. Alternative fuels include biomass  
416 and waste<sup>5</sup>. However, due to the missing country-specific waste ratio data, we simplify the  
417 method by adopting biomass ratio as the alternative fuel ratio at the current level. The data

418 on country-specific biomass ratio is collected from National Inventory Submissions of  
419 UNFCCC. The increasing share of alternative fuels in the energy mix is achieved by  
420 reducing the share of fossil fuels. The energy structure of fossil fuels is assumed to remain  
421 constant in each country over 2020-2050.

422

### 423 **Scenario Set 3: Supplementary Cementitious Materials (S).**

424 Fly ash, blast furnace slag and silica fume are three well-known examples of cement  
425 replacement materials that are in use today. The decreasing clinker-to-cement ratio will be  
426 needed to get on track with the low-carbon cement roadmap. There exists great uncertainty in  
427 the proportion of cement replacement that would be possible. One estimate is that 25-35% of  
428 Ordinary Portland Cement can be substituted with fly ash<sup>56</sup>. Habert et al. assumed a clinker  
429 share of 50% as a technical minimum limit<sup>58</sup>. Similarly, UNEP proposed that up to 50% clinker  
430 displacement is possible through optimized combinations of calcined clay and ground limestone  
431 as cement constituents without affecting cement properties<sup>59</sup>. To be specific, Limestone  
432 Calcined Clay Cement (LC3)-type substitution with clinker factors as low as 50% reach similar  
433 mechanical performances as using ordinary Portland cement<sup>60,61</sup>. It is a promising type of  
434 cement that is similar to currently commercial cements and so might face lower barriers to  
435 commercialization than other novel cement formulations<sup>62</sup>.

436 This study mainly considers the cement properties and mechanical performances when  
437 choosing the feasible share of SCMs in cement. The materials are not considered to be a  
438 limiting factor due to the high availability for materials used in calcined clay and to extensive  
439 amounts of industrial waste or byproducts that could be viable as the solid precursor to  
440 geopolymers<sup>63,64</sup>.

441 Regarding the energy penalty of SCMs, the use of SCMs such as blast-furnace slag, fly ash,  
442 etc., does not involve an additional clinkering process<sup>65</sup>, and the additional electrical energy  
443 demand required to grind the SCMs<sup>32</sup> is out of the emission accounting scope of this study.  
444 Whereas, the adoption of LC3 requires additional calcination process for the clay, which  
445 generates additional emissions and increases energy consumption. The energy intensity of  
446 calcined clay is 2.7 GJ/t<sup>66</sup>. According to simulation results, under the BAU cement production  
447 scenario, the cumulative mitigation effect of LC3 over 2020-2050 would be 14% under BAU  
448 cement production scenario, compared to the effect with 19% achieved by blast-furnace slag  
449 or fly ash. In the main text, we did not specify the types of SCMs, and overlooked the emissions  
450 induced by the calcination process for the clay.

451 S1: assume no change in the country-specific clinker to cement ratio;

452 S2: assume clinker to cement ratio will be 0.50 in 2050 and assume linearly decreasing  
453 from the existing clinker to cement ratio for each country from 2021.

454

### 455 **Scenario Set 4: Carbon capture and storage (CCS) (C).**

456 CCS is a combination of technologies designed to prevent the release of CO<sub>2</sub> generated  
457 through conventional power generation and industrial production processes by injecting the  
458 CO<sub>2</sub> in suitable underground storage reservoirs. As for the deployment of CCS, IEA assumes  
459 that, globally, 50% of future new capacity will be large kilns (i.e., >2Mt per annum), with CCS  
460 equipment<sup>31</sup>. Furthermore, existing cement plants are also expected to be retrofitted with  
461 CCS<sup>5,67,68</sup>, despite the high economic costs and technical challenges of retrofitting<sup>27</sup>. According

462 to the European Cement Research Academy and Cement Sustainability Initiative<sup>32</sup>, 10% of  
463 existing kiln capacity could be equipped with post-combustion technologies although kilns with  
464 a capacity of less than 2500 tonnes per day would not be equipped with CO<sub>2</sub> capture  
465 technologies due to high costs. In line with these studies, we assume that 50% of future new  
466 cement capacity and 10% of existing cement capacity would be implemented with CCS  
467 technology. Larger capacity cement plants will be retrofitted earlier than those with smaller  
468 capacity.

469 There are two main types of CO<sub>2</sub> capture technologies that can be applied in the cement  
470 industry: post combustion and oxy-fuel techniques. Post-combustion carbon capture involves  
471 the separation of CO<sub>2</sub> from cement kiln flue gas and stands out as a potentially promising  
472 carbon capture technology for existing cement plants from the perspective of cost<sup>32,69</sup>. As end-  
473 of-pipe technologies do not require significant integration with the core process other than re-  
474 routing of the flue gas, it could be expected that the retrofit period is aligned as much as possible  
475 with a routinely scheduled production stop for maintenance to minimize the economic impact  
476 of retrofitting<sup>27</sup>. By contrast, oxygen-based combustion in cement kilns will lead to reduced  
477 nitrogen content that does not have to be heated up, which improves fuel efficiency and  
478 provides a relatively low-cost option for CO<sub>2</sub> abatement in cement plants compared to other  
479 technologies<sup>12,31,70,71</sup>. Thus, we assume that new cement capacity would be equipped with oxy-  
480 fuel technology and existing cement kilns would be retrofitted to be equipped with post-  
481 combustion technologies.

482 As for capture efficiency, the assumptions used in each of the analyzed cases is different, and  
483 so are the results. For instance, Farfan et al. assumed that, the efficiencies of carbon capture  
484 are set at 60% in process-related emissions before 2030, and 70% and 80% for 2040 and 2050,  
485 respectively<sup>7</sup>; Zhou et al. assumed a fixed proportion of 85% capture rate for direct emissions  
486 for all scenarios<sup>72</sup>; Miller et al. assumed capture rate with 90% for amine scrubbing and calcium  
487 looping techniques<sup>47</sup>; Hills et al. expected that the capture efficiency would be  $\geq 90\%$  for amine  
488 scrubbing, calcium looping and oxy-fuel techniques<sup>33</sup>; IEA proposed that oxy-fuel techniques  
489 could account for greater shares of cumulative carbon captured CO<sub>2</sub> emissions by 2050 globally  
490 in contrast with post-combustion, based on current knowledge of the techno-economic  
491 performance<sup>12,31</sup>, whose capture yields can theoretically reach 90-99%<sup>12</sup>. This study adopted  
492 the capture efficiency with 95% which is acknowledged by the experts in the CCS field <sup>27,33,34</sup>.  
493 CCS technology incurs an energy penalty. For example, considerable heat is required to  
494 regenerate the absorbent if Mono Ethanol Amine (MEA) is used for post-combustion capture  
495 CO<sub>2</sub> from flue gas. However, the heat required for the CCS technology can to be provided by  
496 electric heaters and/or by using waste heat recovery system<sup>73-75</sup>, which would be excluded from  
497 the scope of emissions accounting in this study. According to previous studies<sup>74</sup>, the CO<sub>2</sub>  
498 avoided ratio (the net reduction of CO<sub>2</sub> emissions per unit of net output, compared to a  
499 reference plant without CO<sub>2</sub> capture <sup>76</sup>) for both oxy-fuel and MEA post-combustion capture  
500 technology are the same as their CO<sub>2</sub> capture rate (CO<sub>2</sub> captured divided by CO<sub>2</sub> generated  
501 with capture). Therefore, the energy penalty of CCS is negligible when only considering direct  
502 process- and energy-related emissions.

503 C1: no application of CCS.

504 C2: The global deployment of CO<sub>2</sub> capture for permanent storage in the cement sector are  
505 planned to start in 2025<sup>17</sup>. The efficiency of carbon capture is set as 95%. 50% of future

506 new cement capacity and 10% of existing cement capacity will be implemented with CCS  
507 technology.

508

509 Combination of each parameter of the 5 variables above means we will have  $4 * 2 * 2 * 2 * 2 =$   
510 64 scenarios.

511

## 512 **Projection of future cement demand**

513 This section illustrates the framework to estimate the country-specific cement demand from  
514 2020 to 2050.

515 **Estimation of floor area.** The per capita floor area measures the basic human need for shelter  
516 and will be a principal factor of rising materials demand for buildings<sup>77,78</sup>. Therefore, we use the  
517 per capita floor area as the proxy to estimate the cement demand in this study. The country-  
518 specific floor area of residential buildings is estimated using applied logistic functions relative  
519 to GDP per capita<sup>79</sup>.

520 First, the actual data for per capita floor area of major countries is collected from local sources  
521 as well as open-access databases, as shown in Supplementary Table 11. We try to include the  
522 latest floor area data for as many countries as possible. Time series for per capita GDP is  
523 collected from the World Bank database.

524 Second, the relationship between per capita floor area and per capita GDP in the corresponding  
525 year (2015 constant Dollars) is modeled using a logistic function<sup>79</sup> (as shown in Supplementary  
526 Figure 4). We assume that there exists a positive correlation between the two indices and that  
527 the growth of buildings would slow as its stock nears the saturation levels reached in developed  
528 countries. Considering the region's similarity in population, urbanization, economic level, etc.,  
529 existing studies project the future energy and material consumption for building based on  
530 region-level assumptions and models<sup>5,80</sup>. Therefore, we establish the region-specific GDP-floor  
531 area function (see ), which increases the accuracy compared to the global average model  
532 adopted in the previous studies<sup>7</sup>. To be specific, we simulate the GDP-floor area function for  
533 American and Asian countries respectively. As for African countries, the global average model  
534 is adopted due to the local very poor data. According to the simulation results, the floor area of  
535 America is usually higher than the global average. It is understandable that America has lower  
536 population and larger per capita land area than other regions. Whereas, the per capita floor  
537 area of Asia is generally lower than the global average at various economic levels, which could  
538 be explained by the high population density in Asia.

539

540 Third, per capita floor area ( $ar_{c,t}$ ) in 2019 for countries is estimated by using applied logistic  
541 functions relative to GDP per capita ( $GDPpc_{c,t}$ ) in 2019. The region-specific floor area project  
542 functions are shown below.

543

$$544 \quad ar_{c,t,x} = \begin{cases} 82.1 \div \{1 + e^{(-0.03615 \times GDPpc_{c,t} + 1.23166)}\}, x \in \text{global countries} \\ 82.1 \div \{1 + e^{(-0.05446 \times GDPpc_{c,t} + 1.45661)}\}, x \in \text{American countries} \\ 82.1 \div \{1 + e^{(-0.03689 \times GDPpc_{c,t} + 1.46750)}\}, x \in \text{Asian countries} \end{cases} \quad (5)$$

545

546 In this step, we also calculate the average levels of global countries and developed countries

547 in per capita floor area in 2019, which are the input of model in cement demand scenario  
548 analysis.

549 However, there still exists some uncertainties. The actual data for per capita floor area that we  
550 collected is mostly for high-income countries already at high levels. The lack of wide range of  
551 countries makes the regression less reliable for the countries with low level of GDP per capita.

552

553 **The projection of future floor area.** Country-specific per capita floor area in 2050 under the  
554 BAU scenario (D1) is estimated based on the projected GDP per capita in 2050, by using the  
555 logistic functions above. The data needed to estimate country-specific GDP per capita in 2050  
556 is collected from the IIASA database under SSP2<sup>18-20</sup>. We divided the total growth into annual  
557 growth averagely, assuming linear growth of floor area per capita over time.

558 Higher housing demand in D2 to D4 corresponds to greater cement production. To fill the gap,  
559 the annual increment of per capita floor area ( $ar$ ), which is set as constant in the BAU scenario,  
560 is assumed to grow linearly between 2020-2050 in the global average scenario. The calculation  
561 for China level and developed average scenarios is similar to that of global average scenario.  
562 The mathematical equations used to estimate the total floor area of residential buildings in  
563 country/region  $c$  in year  $t$  is described below.

$$564 \quad SR_{c,t} = P_{c,t} * ar_{c,t} \quad (6)$$

565 where  $SR_{c,t}$  is the total floor area of the residential building stock,  $P_{c,t}$  is the population of area  
566 and  $ar_{c,t}$  is the per capita floor area of residential building. The projections for country-specific  
567 population every five years over 2020-2050 is taken from the IIASA database under SSP2<sup>18-20</sup>.  
568 Linear interpolation is used for those time periods where data are not available.

569

570 **Estimation of cement demand.** The analytical framework to project cement demand includes  
571 two sub systems: buildings and civil engineering. The demand for buildings can be divided into  
572 two parts- residential and non-residential buildings. Firstly, we adopt the model developed by  
573 Hong et al.<sup>81</sup> to estimate cement demand for residential buildings. This model taking floor area  
574 as the proxy is essentially grounded on a stock-driven model. The stock-driven model was  
575 introduced as an alternative method for simultaneously forecasting resource demand by  
576 Müller<sup>82</sup> in 2006, which has now been widely used in the material flow analysis community to  
577 discuss with social metabolism and climate change<sup>83-86</sup>.

$$578 \quad N_{c,t,t-1} = SR_{c,t} - SR_{c,t-1} + D_{c,t,t-1} \quad (7)$$

579 where  $N_{i,t,t-n}$  is the floor area of newly built residential building in region  $c$  in year  $t$ , and  $D_{c,t,t-n}$   
580 is the demolished residential building because buildings will, of course, be dismantled after their  
581 service lifetime.

582 We estimate  $D_{i,t}$  by demolition rate ( $dr_i$ ), which can be expressed as following. Due to  
583 problems with data availability, in this research, we adopt the demolition rate with 0.5% for all  
584 countries, which is calculated for China and is widely acknowledged and applied<sup>23-25</sup>. Except  
585 for India, we adopt the demolition rate with 1.43%, which is estimated by the ratio of buildings  
586 over 80 years old<sup>23,26</sup>.

$$587 \quad D_{c,t} = SR_c * dr_c \quad (8)$$

588 Limited data availability for demolition rates at the national level may limit the accuracy of our  
589 cement demand projection model. We conduct a sensitivity analysis of cement demand to the  
590 demolition rate. Previous studies find that in high building turnover scenarios, the demolition

591 ratio may increase by a factor of 1.5 above historical rates<sup>87</sup>. However, even if we assume that  
 592 demolition rates are increased by a factor of 1.5, total cement demand over 2020-2050 under  
 593 the BAU scenario from developing countries would only rise by 5%. Therefore, despite the data  
 594 limitations, based on these sensitivity results we believe that the uncertainty in the demolition  
 595 rate does not significantly affect the overall findings of our study.

596

597 Total cement demand for residential buildings in country or region  $c$  in year  $t$  can be expressed  
 598 as following, multiplying the cement intensity of residential buildings  $CIR_{i,t}$  and newly built  
 599 residential building floor area.

$$600 \quad CR_{c,t} = [SR_{c,t} - SR_{c,t-1} * (1 - dr_c)] * CIR_{c,t} \quad (9)$$

601 In addition to the residential buildings, non-residential buildings include all buildings not  
 602 intended for private occupancy whether on a permanent basis or not; for example, buildings  
 603 used for institutional, commercial or industrial purposes. It is also underlined to include  
 604 infrastructure in future assessment<sup>88</sup>. However, it is difficult to account for non-residential  
 605 buildings as well as infrastructure stock directly. The detailed data that can be used to directly  
 606 estimate cement demands, such as per capita floor area for non-residential buildings and  
 607 cement intensity for transport infrastructure, were not available. Therefore, the indirect way built  
 608 up a relationship between cement demand from residential building and those from other  
 609 sectors by assuming varying ratios for them in different countries based on existing studies<sup>78</sup>,  
 610 so that cement demands from those other sectors are calculated. For instance, Yang estimated  
 611 that per capita construction area of non-residential buildings is 80% of that in residential  
 612 buildings in European countries<sup>89</sup>; Shi et al. adopted this value with 80% for China<sup>77</sup>; Cao et al.  
 613 adopted the split ratios of the building sector in China during 1970-2013 are around 75% and  
 614 ratios of infrastructure sector around 20%<sup>78</sup>. Therefore, this research simplifies the accounting  
 615 method by assuming a region-specific ratio between residential and non-residential buildings  
 616 and civil engineering. Existing literature provides the mix of in-use cement stocks between  
 617 residential buildings, non-residential buildings and civil engineering for the 15 largest cement  
 618 producers<sup>22</sup>. According to this literature, we assume the transition rate of residential building  
 619 and the others for Asia with 2.4, Former Soviet Union with 4, Latin America with 3 and rest of  
 620 the world with 3. To be specific, For Latin America, we have data for Mexico and Brazil and they  
 621 could be used as a first estimate; for Asia, we have Turkey, Iran, India and China and use the  
 622 average level of them as the estimate; we get the data for Former Soviet Union directly; as for  
 623 Africa, we adopt the split ratios for the rest of world.

$$624 \quad CO_{c,t} = CR_{c,t} * tr_{c,t} \quad (10)$$

625 where  $CO_{c,t}$  is the cement demand of the non-residential building and civil engineering in  
 626 country/region  $c$  in year  $t$ ,  $tr_{c,t}$  is the transition rate.

627 Then the total cement demand of country/region  $c$  in year  $t$  ( $C_{c,t}$ ) can be expressed as following:

$$628 \quad C_{c,t,origin} = CO_{c,t} + CR_{c,t} \quad (11)$$

629 Despite the good agreement in region-specific cement demand between our study and IEA<sup>12</sup>,  
 630 there still exists uncertainty between the theoretical and actual value of cement demand of each  
 631 country because most parameters used in the method is region-specific due to the data  
 632 availability. Thus, this study further adopts a country-specific correction ratio ( $cr_c$ ) to scale the  
 633 value of total cement demand in country or region  $c$  in year  $t$ .

$$634 \quad cr_c = C_{c,2020,actual} \div C_{c,2020,estimated} \quad (12)$$



635  
636

$$C_{c,t,correct} = C_{c,t,origin} * cr_c \quad (13)$$

### 637 **Estimation of future cement CO<sub>2</sub> emissions under low carbon measures**

638 This section describes the framework to project future cement emissions, which integrates the  
639 plant- and country-level calculation methods.

640

641 **Plant-level emissions projections.** To estimate future CO<sub>2</sub> emissions of existing cement  
642 plants, the global plant-level cement database is adopted to provides basic plant-level  
643 information on commission year, capacity and process parameters. Our approach to projecting  
644 future plant-level emissions can be divided into the following steps.

645 First, the commissioning year is used to determine when the cement plant would be expected  
646 to retire. We set the retirement age at 50 years, which is relatively long<sup>90</sup>. For example, IEA  
647 previously assumed the lifetime of cement kilns was in the range of 30-50 years<sup>31</sup>.

648 Second, the cement production of each plant is determined by the installed capacity and  
649 capacity factor in most cases. We assume that the capacity factors ( $CF_{c,t}$ ) of cement plants  
650 remain constant over time when the demand of cement demand in the region exhibits an  
651 upward trend. By contrast, cement plants will reduce the capacity factors uniformly in response  
652 to a declining regional demand for cement.

653 Third, operating cement plants will adopt low carbon techniques according to the scenario  
654 setting, which largely reduce cement emissions. To be specific we explore three approaches to  
655 existing cement plants: (i) retrofitting low-efficiency kilns contribute to emissions mitigation by  
656 reducing the energy intensity of cement plants ( $EI_k$ ); (ii) using waste fuels as an input will  
657 change the composition of energy sources ( $S_{i,c}$ ) and drive this shift towards less carbon-  
658 intensive energy sources and (iii) incorporating SCMs will help decrease cement emissions by  
659 reducing clinker-to-cement ratio ( $R_{clk\ to\ cmt,c}$ ). As for the kiln upgrading, the kiln type of each  
660 plant is used to decide whether to retrofit and the commission year is used to determine the  
661 plausibility and timing of retrofitting the facilities. To be specific, under the energy efficiency  
662 scenario, semi-wet, semi-dry, wet, draft kilns will be retrofitted to dry kilns considering their  
663 lower energy efficiency, and all kilns would be implemented with the pre-decomposition kiln to  
664 increase the efficiency. The cement plants owning large capacity will be retrofitted earlier than  
665 those with low capacity, considering the economic cost. The plants that are assumed to retire  
666 before 2050 will not be considered appropriate for kiln upgrading. The effects of adopting waste  
667 fuels and SCMs are simulated based on the country-level data of energy structure and clinker-  
668 to-cement ratio. Regarding the waste fuels, it is assumed that local municipal solid waste will  
669 be sufficient in each country in the near future. We demonstrate the availability of waste fuels  
670 by comparing the recent country-specific annual generation volume of municipal solid waste  
671 and the future amount of municipal solid waste needed for fuel in cement production (shown in  
672 **Figure S 16**). Regarding the SCMs, there is strong evidence that the materials are not a limiting  
673 factor due to the high availability for materials used in calcined clay and to extensive amounts  
674 of industrial waste or byproducts that could be viable as the solid precursor to geopolymers<sup>63,64</sup>.

675

676 **Country-level emissions projection.** Considering continued growth in cement demand and

677 the retirement of some existing cement plants, many more cement plants will need to be built  
678 and emissions from these newly installed facilities are calculated at the country level. Country-  
679 specific parameters on cement production, energy intensity, emission factor, clinker-to-cement  
680 ratio are adopted to account for the cement emissions. Furthermore, we explore four  
681 approaches to newly built cement plants: (i) adopting high-efficiency kilns; (ii) using waste fuels;  
682 (iii) incorporating SCMs; and (iv) incorporating CCS. The emission mitigation effects of four  
683 approaches are assessed on country-level. When assessing the effects of high-efficiency kilns,  
684 it is assumed that all newly built cement plants would be retrofitted with new dry kilns with the  
685 energy intensity of 3370.19 MJ/t clinker<sup>13</sup>. The approach of the waste fuel and SCMs mitigation  
686 effects assessment is same to the plant-level projection. For the CCS deployment, we adopt  
687 the country-specific CCS installed capacity and global average CCS capture efficiency to  
688 estimate the mitigation effects. The CCS installed capacity is calculated by multiplying newly  
689 built cement capacity and CCS implementation rate. This study assumes that oxy-fuel  
690 technology would be adopted as it improves fuel efficiency and provides a relatively low-cost  
691 option for CO<sub>2</sub> abatement in cement plants compared to other technologies<sup>12,31,70,71</sup>. Oxy-fuel  
692 technologies not only capture fuel-derived CO<sub>2</sub> emissions, but also the large proportion emitted  
693 by the raw meal calcination. Then, the quantity of CO<sub>2</sub> captured is calculated by multiplying (1-  
694 capture efficiency factor) and the total emission amount, which is also applied by other  
695 researches<sup>7,29</sup>.

696

697

### 698 **Sensitivity Analysis**

699 We conduct sensitivity analysis on key scenario assumptions.

700 The first step is assuming probability distributions for each input variable. Previous studies  
701 usually obtain the distribution from the literature or by assuming a uniform distribution with a  
702 variation range of, say,  $\pm 20\%$ , 30% or 100%<sup>91-93</sup>. In this study, we assume a uniform distribution  
703 with a  $\pm 20\%$  uncertainty range for the scenarios of low-carbon measures, while the uncertainty  
704 range of variables in cement production scenario is set assuming the normal distribution of per  
705 capita floor area with the real data. The distributional characteristics of these variables are listed  
706 in Supplementary Table 14. In terms of the cement production scenario set, we choose the  
707 global average and developed average scenarios to investigate the sensitivity of future cement  
708 production. The China level scenario is excluded in sensitivity analysis, because the uncertainty  
709 in this scenario mainly comes from the statistical bias of activity data which is quite low. In the  
710 emission mitigation scenario sets, the potential variation in kiln efficiency improvement is not  
711 studied, because it is markedly smaller than three other low carbon technologies. We performed  
712 Monte Carlo Analysis with 1000 iterations by varying each variable (random sampling) while  
713 holding other variables constant.

714

715 The uncertainty of the outputs (cumulative emissions over 2020-2050) was represented in  
716 Supplementary Table 15. To evaluate the variables' sensitivity, scatter plots and probability  
717 distribution figure are also used as below (see Supplementary Figure 9 and Supplementary  
718 Figure 10). Scatter plot is a useful tool for rapid determination of the relation between inputs  
719 and outputs<sup>94</sup>. If any variable has a considerable effect on any dependent variable, then a  
720 discernible pattern would appear in the corresponding scatter plot.

721 Linear relationship between inputs and output was observed in all these plots except the global  
722 average scenario. In the global average scenario, cumulative emissions do not decrease  
723 linearly with the decrease of average floor area. This is because with global-average floor area  
724 decreasing, more countries have an average floor area larger than global-average floor area.  
725 Their future cement demand is therefore assumed to be constant, making cumulative emissions  
726 not sensitive to the decrease of global-average floor area. This phenomenon also explains the  
727 reason why the cumulative emissions at the 10% are the same as min value of the range.  
728 Among three low carbon measures, the output is most sensitive to the supplementary  
729 cementitious materials. More specifically, cumulative emissions change -8% when the clinker  
730 to cement ratio in cement decreased by 20%. In contrast, the sensitivity level of waste fuels is  
731 the lowest. The cumulative emissions changes -1% when the share of waste fuels in energy  
732 mix grows by 20%. The supplementary cementitious materials have different variation trends  
733 in comparison to CCS and waste fuels, because the higher clinker to cement ratio corresponds  
734 to the lower appliance of SCMs.  
735

### 736 **Supplementary References**

- 737 1 Kaza, S., Yao, L., Bhada-Tata, P. & Van Woerden, F. *What a waste 2.0: a global snapshot*  
738 *of solid waste management to 2050*. (World Bank Publications, 2018).
- 739 2 Malinauskaite, J. *et al.* Municipal solid waste management and waste-to-energy in the  
740 context of a circular economy and energy recycling in Europe. *Energy* **141**, 2013-2044,  
741 doi:<https://doi.org/10.1016/j.energy.2017.11.128> (2017).
- 742 3 Porteous, A. Why energy from waste incineration is an essential component of  
743 environmentally responsible waste management. *Waste management* **25**, 451-459 (2005).
- 744 4 Hasanbeigi, A. & Springer, C. California's Cement Industry: Failing the Climate Challenge.  
745 (Global Eciency Intelligence, San Francisco, CA, 2019).
- 746 5 Fernandez Pales, A. & Leung, Y. Technology Roadmap: Low-Carbon Transition in the  
747 Cement Industry. (International Energy Agency, 2018).
- 748 6 Chen, C. *et al.* A striking growth of CO<sub>2</sub> emissions from the global cement industry driven  
749 by new facilities in emerging countries. *Environ. Res. Lett.* **17**, 044007, doi:10.1088/1748-  
750 9326/ac48b5 (2022).
- 751 7 Farfan, J., Fasihi, M. & Breyer, C. Trends in the global cement industry and opportunities  
752 for long-term sustainable CCU potential for Power-to-X. *Journal of Cleaner Production*  
753 **217**, 821-835, doi:<https://doi.org/10.1016/j.jclepro.2019.01.226> (2019).
- 754 8 Janssens-Maenhout, G. *et al.* EDGAR v4. 3.2 Global Atlas of the three major greenhouse  
755 gas emissions for the period 1970–2012. *Earth System Science Data* **11**, 959-1002 (2019).
- 756 9 Le Quéré, C. *et al.* Global carbon budget 2016. *Earth System Science Data* **8**, 605-649  
757 (2016).
- 758 10 Andrew, R. M. Global CO<sub>2</sub> emissions from cement production, 1928–2018. *Earth Syst. Sci.*  
759 *Data* **11**, 1675-1710, doi:10.5194/essd-11-1675-2019 (2019).
- 760 11 Liu, Z. *et al.* Reduced carbon emission estimates from fossil fuel combustion and cement  
761 production in China. *Nature* **524**, 335-338 (2015).
- 762 12 Fernandez Pales, A. & Leung, Y. Technology Roadmap-Low-Carbon Transition in the

763 Cement Industry (International Energy Agency, 2018).  
764 13 National Development and Reform Commission of China. Special plan for cement industry  
765 development. (China, 2006).  
766 14 SCHORCHT, F., KOURTI, I., SCALET, B. M., ROUDIER, S. & SANCHO, L. D. Best Available  
767 Techniques (BAT) Reference Document for the Production of Cement, Lime and  
768 Magnesium Oxide: Industrial Emissions Directive 2010/75/EU:(Integrated Pollution  
769 Prevention and Control). (Luxembourg, 2013).  
770 15 United States Environmental Protection Agency. Emission factors for greenhouse gas  
771 inventories. (US Environmental Protection Agency, US, 2021).  
772 16 Dean, B., Dulac, J., Petrichenko, K. & Graham, P. Towards zero-emission efficient and  
773 resilient buildings: Global status report. (Paris, 2016).  
774 17 International Energy Agency. Energy Technology Perspectives 2016. (IEA, Paris, 2016).  
775 18 Rogelj, J. *et al.* Scenarios towards limiting global mean temperature increase below 1.5 C.  
776 *Nat. Clim. Chang.* **8**, 325-332 (2018).  
777 19 Riahi, K. *et al.* The Shared Socioeconomic Pathways and their energy, land use, and  
778 greenhouse gas emissions implications: An overview. *Global Environmental Change* **42**,  
779 153-168 (2017).  
780 20 Gidden, M. J. *et al.* Global emissions pathways under different socioeconomic scenarios  
781 for use in CMIP6: a dataset of harmonized emissions trajectories through the end of the  
782 century. *Geoscientific Model Development Discussions*, 1-42 (2018).  
783 21 International Energy Agency & the United Nations Environment Programme.  
784 2018 Global Status Report: Towards a zero-emission, efficient and resilient buildings and  
785 construction sector. (2018).  
786 22 Cao, Z., Shen, L., Løvik, A. N., Müller, D. B. & Liu, G. Elaborating the history of our  
787 cementing societies: an in-use stock perspective. *Environ. Sci. Technol.* **51**, 11468-11475  
788 (2017).  
789 23 Daigo, I., Iwata, K., Oguchi, M. & Goto, Y. Lifetime distribution of buildings decided by  
790 economic situation at demolition: D-based lifetime distribution. *Procedia CIRP* **61**, 146-  
791 151 (2017).  
792 24 Zhou, W., Moncaster, A., Reiner, D. M. & Guthrie, P. Estimating Lifetimes and Stock  
793 Turnover Dynamics of Urban Residential Buildings in China. *Sustainability* **11**, 3720 (2019).  
794 25 Zhou, W., O'Neill, E., Moncaster, A., Reiner, D. M. & Guthrie, P. Forecasting urban  
795 residential stock turnover dynamics using system dynamics and Bayesian model averaging.  
796 *Applied Energy* **275**, 115388 (2020).  
797 26 Jain, S., Singhal, S. & Jain, N. K. Construction and demolition waste generation in cities in  
798 India: an integrated approach. *International Journal of Sustainable Engineering* **12**, 333-  
799 340 (2019).  
800 27 Roussanaly, S. *et al.* Towards improved cost evaluation of Carbon Capture and Storage  
801 from industry. *International Journal of Greenhouse Gas Control* **106**, 103263,  
802 doi:<https://doi.org/10.1016/j.ijggc.2021.103263> (2021).  
803 28 D'Arcy, P. & Veroude, A. Housing trends in China and India. *Reserve Bank of Australia*  
804 *Bulletin*, 63-68 (2014).  
805 29 Wang, Y., Höller, S., Viebahn, P. & Hao, Z. Integrated assessment of CO2 reduction  
806 technologies in China's cement industry. *International Journal of Greenhouse Gas Control*

807 20, 27-36, doi:<https://doi.org/10.1016/j.jiggc.2013.10.004> (2014).

808 30 Garcia, M. & Berghout, N. Toward a common method of cost-review for carbon capture  
809 technologies in the industrial sector: cement and iron and steel plants. *International*  
810 *Journal of Greenhouse Gas Control* **87**, 142-158 (2019).

811 31 International Energy Agency. *Cement Technology Roadmap: Carbon Emissions*  
812 *Reductions up to 2050*. (2009).

813 32 ECRA (European Cement Research Academy) and CSI (Cement Sustainability Initiative).  
814 Development of State of the Art-Techniques in Cement Manufacturing: Trying to Look  
815 Ahead. (Duesseldorf, Geneva, 2017).

816 33 Hills, T., Leeson, D., Florin, N. & Fennell, P. Carbon Capture in the Cement Industry:  
817 Technologies, Progress, and Retrofitting. *Environ. Sci. Technol.* **50**, 368-377,  
818 doi:10.1021/acs.est.5b03508 (2016).

819 34 Obrist, M. D., Kannan, R., Schmidt, T. J. & Kober, T. Decarbonization pathways of the Swiss  
820 cement industry towards net zero emissions. *Journal of Cleaner Production* **288**, 125413,  
821 doi:<https://doi.org/10.1016/j.jclepro.2020.125413> (2021).

822 35 Vatopoulos, K. & Tzimas, E. Assessment of CO<sub>2</sub> capture technologies in cement  
823 manufacturing process. *Journal of Cleaner Production* **32**, 251-261,  
824 doi:<https://doi.org/10.1016/j.jclepro.2012.03.013> (2012).

825 36 Cormos, A.-M. & Cormos, C.-C. Reducing the carbon footprint of cement industry by  
826 post-combustion CO<sub>2</sub> capture: Techno-economic and environmental assessment of a  
827 CCS project in Romania. *Chemical Engineering Research and Design* **123**, 230-239,  
828 doi:<https://doi.org/10.1016/j.cherd.2017.05.013> (2017).

829 37 Lisbona, P., Gori, R., Romeo, L. M. & Desideri, U. Techno-economic assessment of an  
830 industrial carbon capture hub sharing a cement rotary kiln as sorbent regenerator.  
831 *International Journal of Greenhouse Gas Control* **112**, 103524,  
832 doi:<https://doi.org/10.1016/j.jiggc.2021.103524> (2021).

833 38 Atsonios, K., Grammelis, P., Antiohos, S. K., Nikolopoulos, N. & Kakaras, E. Integration of  
834 calcium looping technology in existing cement plant for CO<sub>2</sub> capture: Process modeling  
835 and technical considerations. *Fuel* **153**, 210-223,  
836 doi:<https://doi.org/10.1016/j.fuel.2015.02.084> (2015).

837 39 Xu, J.-H., Yi, B.-W. & Fan, Y. A bottom-up optimization model for long-term CO<sub>2</sub>  
838 emissions reduction pathway in the cement industry: A case study of China. *International*  
839 *Journal of Greenhouse Gas Control* **44**, 199-216,  
840 doi:<https://doi.org/10.1016/j.jiggc.2015.11.028> (2016).

841 40 Tomatis, M., Jeswani, H. K., Stamford, L. & Azapagic, A. Assessing the environmental  
842 sustainability of an emerging energy technology: Solar thermal calcination for cement  
843 production. *Science of The Total Environment* **742**, 140510,  
844 doi:<https://doi.org/10.1016/j.scitotenv.2020.140510> (2020).

845 41 Xu, J.-H., Fleiter, T., Fan, Y. & Eichhammer, W. CO<sub>2</sub> emissions reduction potential in China's  
846 cement industry compared to IEA's Cement Technology Roadmap up to 2050. *Applied*  
847 *Energy* **130**, 592-602, doi:<https://doi.org/10.1016/j.apenergy.2014.03.004> (2014).

848 42 van Ruijven, B. J. *et al.* Long-term model-based projections of energy use and CO<sub>2</sub>  
849 emissions from the global steel and cement industries. *Resources, Conservation and*  
850 *Recycling* **112**, 15-36, doi:<https://doi.org/10.1016/j.resconrec.2016.04.016> (2016).

851 43 WBCSD Cement Sustainability Initiative (CSI) and European Cement Research Academy  
852 (ECRA). *Cement CO<sub>2</sub> and Energy Protocol version 3.1*,  
853 <<https://gccassociation.org/sustainability-innovation/gnr-gcca-in-numbers/>> (2020).

854 44 World Bank. *GDP (current US\$) - India*,  
855 <<https://data.worldbank.org/indicator/NY.GDP.MKTP.CD?locations=IN>> (2020).

856 45 Shan, Y. *et al.* Peak cement-related CO<sub>2</sub> emissions and the changes in drivers in China.  
857 *Journal of Industrial Ecology* **23**, 959-971, doi:<https://doi.org/10.1111/jiec.12839> (2019).

858 46 Intergovernmental Panel on Climate Change. *IPCC guidelines for national greenhouse gas*  
859 *inventories 2006*. Vol. 5 (Hayama, Japan: Institute for Global Environmental Strategies,  
860 2006).

861 47 Miller, S. A. & Moore, F. C. Climate and health damages from global concrete production.  
862 *Nature Climate Change* **10**, 439-443, doi:10.1038/s41558-020-0733-0 (2020).

863 48 Guterres, A. World Economic Situation Prospects 2020. (UN Departments of Global  
864 Communications & Economic and Social Affairs, 2020).

865 49 Liu, J. *et al.* Carbon and air pollutant emissions from China's cement industry 1990–2015:  
866 trends, evolution of technologies, and drivers. *Atmospheric Chemistry Physics* **21**, 1627-  
867 1647 (2021).

868 50 Grubler, A. *et al.* A low energy demand scenario for meeting the 1.5 C target and  
869 sustainable development goals without negative emission technologies. *Nature energy* **3**,  
870 515-527 (2018).

871 51 The European Cement Association. The role of cement in the 2050 low carbon economy.  
872 (The European Cement Association, Brussels, 2018).

873 52 Ali, M. B., Saidur, R. & Hossain, M. S. A review on emission analysis in cement industries.  
874 *Renewable and Sustainable Energy Reviews* **15**, 2252-2261,  
875 doi:<https://doi.org/10.1016/j.rser.2011.02.014> (2011).

876 53 Hasanbeigi, A., Price, L. & Lin, E. Emerging energy-efficiency and CO<sub>2</sub> emission-reduction  
877 technologies for cement and concrete production: A technical review. *Renewable*  
878 *Sustainable Energy Reviews* **16**, 6220-6238 (2012).

879 54 Benhelal, E., Zahedi, G., Shamsaei, E. & Bahadori, A. Global strategies and potentials to  
880 curb CO<sub>2</sub> emissions in cement industry. *Journal of cleaner production* **51**, 142-161 (2013).

881 55 Ke, J., Zheng, N., Fridley, D., Price, L. & Zhou, N. Potential energy savings and CO<sub>2</sub>  
882 emissions reduction of China's cement industry. *Energy Policy* **45**, 739-751,  
883 doi:<https://doi.org/10.1016/j.enpol.2012.03.036> (2012).

884 56 Ishak, S. A. & Hashim, H. Low carbon measures for cement plant – a review. *Journal of*  
885 *Cleaner Production* **103**, 260-274, doi:<https://doi.org/10.1016/j.jclepro.2014.11.003>  
886 (2015).

887 57 Georgiopoulou, M. & Lyberatos, G. Life cycle assessment of the use of alternative fuels in  
888 cement kilns: A case study. *Journal of Environmental Management* **216**, 224-234,  
889 doi:<https://doi.org/10.1016/j.jenvman.2017.07.017> (2018).

890 58 Habert, G., Billard, C., Rossi, P., Chen, C. & Roussel, N. J. C. Cement production technology  
891 improvement compared to factor 4 objectives. *Cement Concrete Research* **40**, 820-826  
892 (2010).

893 59 Environment UN, Scrivener, K. L., John, V. M. & Gartner, E. M. Eco-efficient cements:  
894 Potential economically viable solutions for a low-CO<sub>2</sub> cement-based materials industry.

895 *Cement Concrete Research* **114**, 2-26 (2018).

896 60 Sharma, M., Bishnoi, S., Martirena, F. & Scrivener, K. Limestone calcined clay cement and  
897 concrete: A state-of-the-art review. *Cement and Concrete Research* **149**, 106564,  
898 doi:<https://doi.org/10.1016/j.cemconres.2021.106564> (2021).

899 61 Dhandapani, Y., Sakthivel, T., Santhanam, M., Gettu, R. & Pillai, R. G. Mechanical properties  
900 and durability performance of concretes with Limestone Calcined Clay Cement (LC3).  
901 *Cement and Concrete Research* **107**, 136-151,  
902 doi:<https://doi.org/10.1016/j.cemconres.2018.02.005> (2018).

903 62 Fennell, P. S., Davis, S. J. & Mohammed, A. Decarbonizing cement production. *Joule* **5**,  
904 1305-1311, doi:<https://doi.org/10.1016/j.joule.2021.04.011> (2021).

905 63 Miller, S. A., John, V. M., Pacca, S. A. & Horvath, A. Carbon dioxide reduction potential in  
906 the global cement industry by 2050. *Cement and Concrete Research* **114**, 115-124,  
907 doi:<https://doi.org/10.1016/j.cemconres.2017.08.026> (2018).

908 64 Miller, S. A. Supplementary cementitious materials to mitigate greenhouse gas emissions  
909 from concrete: can there be too much of a good thing? *Journal of Cleaner Production*  
910 **178**, 587-598, doi:<https://doi.org/10.1016/j.jclepro.2018.01.008> (2018).

911 65 Lothenbach, B., Scrivener, K. & Hooton, R. D. Supplementary cementitious materials.  
912 *Cement and Concrete Research* **41**, 1244-1256,  
913 doi:<https://doi.org/10.1016/j.cemconres.2010.12.001> (2011).

914 66 Cancio Díaz, Y. *et al.* Limestone calcined clay cement as a low-carbon solution to meet  
915 expanding cement demand in emerging economies. *Development Engineering* **2**, 82-91,  
916 doi:<https://doi.org/10.1016/j.deveng.2017.06.001> (2017).

917 67 IEAGHG. Deployment of CCS in the cement industry. (2013).

918 68 International Energy Agency. *Energy technology perspectives 2012: pathways to a clean*  
919 *energy system*. (OECD Publishing, 2012).

920 69 Vega, F. *et al.* Current status of CO<sub>2</sub> chemical absorption research applied to CCS:  
921 Towards full deployment at industrial scale. *Applied Energy* **260**, 114313,  
922 doi:<https://doi.org/10.1016/j.apenergy.2019.114313> (2020).

923 70 Carrasco-Maldonado, F. *et al.* Oxy-fuel combustion technology for cement production –  
924 State of the art research and technology development. *International Journal of*  
925 *Greenhouse Gas Control* **45**, 189-199, doi:<https://doi.org/10.1016/j.ijggc.2015.12.014>  
926 (2016).

927 71 Cavalett, O., Cherubini, F. & Olsson, O. Deployment of bio-CCS in the cement sector: an  
928 overview of technology options and policy tools. (IEA Bioenergy, 2021).

929 72 Zhou, W. *et al.* Capturing CO<sub>2</sub> from cement plants: A priority for reducing CO<sub>2</sub> emissions  
930 in China. *Energy* **106**, 464-474, doi:<https://doi.org/10.1016/j.energy.2016.03.090> (2016).

931 73 Guo, Y. *et al.* A review of low-carbon technologies and projects for the global cement  
932 industry. *Journal of Environmental Sciences* **136**, 682-697,  
933 doi:<https://doi.org/10.1016/j.jes.2023.01.021> (2024).

934 74 Voldsund, M. *et al.* Comparison of Technologies for CO<sub>2</sub> Capture from Cement  
935 Production—Part 1: Technical Evaluation. *Energies* **12** (2019).

936 75 Diego, M. E., Arias, B. & Abanades, J. C. Analysis of a double calcium loop process  
937 configuration for CO<sub>2</sub> capture in cement plants. *Journal of Cleaner Production* **117**, 110-  
938 121, doi:<https://doi.org/10.1016/j.jclepro.2016.01.027> (2016).



- 939 76 IPCC. IPCC Special Report on Carbon Dioxide Capture and Storage. (United Kingdom and  
940 New York, 2005).
- 941 77 Shi, F. *et al.* Toward a Low Carbon–Dematerialization Society: Measuring the Materials  
942 Demand and CO<sub>2</sub> Emissions of Building and Transport Infrastructure Construction in  
943 China. *Journal of Industrial Ecology* **16**, 493-505 (2012).
- 944 78 Cao, Z. *et al.* Estimating the in-use cement stock in China: 1920–2013. *Resources,*  
945 *Conservation and Recycling* **122**, 21-31,  
946 doi:<https://doi.org/10.1016/j.resconrec.2017.01.021> (2017).
- 947 79 Poponi, D. *et al.* *Energy technology perspectives 2016: towards sustainable urban energy*  
948 *systems*. (International Energy Agency, 2016).
- 949 80 Chatterjee, S., Kiss, B., Ürge-Vorsatz, D. & Teske, S. in *Achieving the Paris Climate*  
950 *Agreement Goals : Part 2: Science-based Target Setting for the Finance industry — Net-*  
951 *Zero Sectoral 1.5°C Pathways for Real Economy Sectors* (eds Sven Chatterjee Teske,  
952 Souran, Benedek Kiss, Diana Ürge-Vorsatz, & Sven Teske) 161-185 (Springer  
953 International Publishing, 2022).
- 954 81 Hong, L., Zhou, N., Fridley, D., Feng, W. & Khanna, N. in *ACEEE summer study on energy*  
955 *efficiency in buildings*. (eds Lixuan Hong *et al.*) 146-157.
- 956 82 B. Müller, D. Stock dynamics for forecasting material flows—Case study for housing in The  
957 Netherlands. *Ecological Economics* **59**, 142-156,  
958 doi:<https://doi.org/10.1016/j.ecolecon.2005.09.025> (2006).
- 959 83 Bergsdal, H., Brattebø, H., Bohne, R. A. & Müller, D. B. Dynamic material flow analysis for  
960 Norway's dwelling stock. *Building Research Information* **35**, 557-570 (2007).
- 961 84 Müller, E., Hilty, L. M., Widmer, R., Schluep, M. & Faulstich, M. Modeling metal stocks and  
962 flows: a review of dynamic material flow analysis methods. *Environmental science*  
963 *technology* **48**, 2102-2113 (2014).
- 964 85 Pauliuk, S. & Müller, D. B. The role of in-use stocks in the social metabolism and in climate  
965 change mitigation. *Global Environmental Change* **24**, 132-142,  
966 doi:<https://doi.org/10.1016/j.gloenvcha.2013.11.006> (2014).
- 967 86 Lauinger, D., Billy, R. G., Vásquez, F. & Müller, D. B. A general framework for stock  
968 dynamics of populations and built and natural environments. *Journal of Industrial Ecology*  
969 **25**, 1136-1146 (2021).
- 970 87 Berrill, P. & Hertwich, E. Material flows and GHG emissions from housing stock evolution  
971 in US counties, 2020–60. *Buildings and Cities* **2**, 599-617, doi:10.5334/bc.126 (2021).
- 972 88 Schiller, G. Urban infrastructure: challenges for resource efficiency in the building stock.  
973 *Building Research & Information* **35**, 399-411, doi:10.1080/09613210701217171 (2007).
- 974 89 Yang, W. *Modeling the evolution of the Chinese building stock in a sustainable*  
975 *perspective (in Chinese)* Ph.D. thesis, Tianjin University, (2006).
- 976 90 Ellis, J. *An Initial View on Methodologies for Emission Baselines: Cement Case Study, OECD*  
977 *and IEA Information Paper*. (Organization for Economic Cooperation Development,  
978 2000).
- 979 91 Chen, Z. *et al.* Assessment of regional greenhouse gas emission from beef cattle  
980 production: A case study of Saskatchewan in Canada. *Journal of Environmental*  
981 *Management* **264**, 110443, doi:<https://doi.org/10.1016/j.jenvman.2020.110443> (2020).
- 982 92 Sohani, A., Rezapour, S. & Sayyaadi, H. Comprehensive performance evaluation and



983 demands' sensitivity analysis of different optimum sizing strategies for a combined  
984 cooling, heating, and power system. *Journal of Cleaner Production* **279**, 123225,  
985 doi:<https://doi.org/10.1016/j.jclepro.2020.123225> (2021).

986 93 Brown, L. *et al.* An inventory of nitrous oxide emissions from agriculture in the UK using  
987 the IPCC methodology: emission estimate, uncertainty and sensitivity analysis.  
988 *Atmospheric Environment* **35**, 1439-1449, doi:[https://doi.org/10.1016/S1352-](https://doi.org/10.1016/S1352-2310(00)00361-7)  
989 [2310\(00\)00361-7](https://doi.org/10.1016/S1352-2310(00)00361-7) (2001).

990 94 Turgut, S. S., Feyissa, A. H., Küçüköner, E. & Karacabey, E. Uncertainty and sensitivity  
991 analysis by Monte Carlo simulation: Recovery of trans-resveratrol from grape cane by  
992 pressurised low polarity water system. *Journal of Food Engineering* **292**, 110366,  
993 doi:<https://doi.org/10.1016/j.jfoodeng.2020.110366> (2021).

994
